# Supplementary material
Source: PubMed Central journal article supplement (PMC7755424)
Supplement: NIHMS1653385-supplement-Supplementary_Information.pdf [file NIHMS1653385-supplement-Supplementary_Information.pdf]

# SUPPORTING INFORMATION FOR

## **2-Oxaadamant-1-yl ureas as soluble epoxide hydrolase inhibitors: *in vivo* evaluation in a murine model of acute pancreatitis**

*Sandra Codony<sup>1</sup>, Eugènia Pujol<sup>1</sup>, Javier Pizarro<sup>2,3,4</sup>, Ferran Feixas<sup>5</sup>, Elena Valverde<sup>1,2</sup>,  
M. Isabel Loza<sup>6</sup>, José M. Brea<sup>6</sup>, Elena Saez<sup>7</sup>, Julen Oyarzabal<sup>7</sup>, Antonio Pineda-  
Lucena<sup>7</sup>, Belén Pérez<sup>8</sup>, Concepción Pérez<sup>9</sup>, María Isabel Rodríguez-Franco<sup>9</sup>, Rosana  
Leiva<sup>1</sup>, Sílvia Osuna<sup>5,10</sup>, Christophe Morisseau<sup>11</sup>, Bruce D. Hammock<sup>11</sup>, Manuel  
Vázquez-Carrera<sup>2,3,4</sup>, Santiago Vázquez<sup>1\*</sup>*

<sup>1</sup>Laboratori de Química Farmacèutica (Unitat Associada al CSIC), and <sup>2</sup>Pharmacology, Departament de Farmacologia, Toxicologia i Química Terapèutica, Facultat de Farmàcia i Ciències de l'Alimentació, and Institute of Biomedicine (IBUB), Universitat de Barcelona, Av. Joan XXIII, 27-31, 08028 Barcelona, Spain.

<sup>3</sup>Spanish Biomedical Research Center in Diabetes and Associated Metabolic Diseases (CIBERDEM)-Instituto de Salud Carlos III, 28029 Madrid, Spain.

<sup>4</sup>Pediatric Research Institute-Hospital Sant Joan de Déu, 08950 Esplugues de Llobregat, Spain.

<sup>5</sup>CompBioLab Group, Departament de Química and Institut de Química Computacional i Catàlisi (IQCC), Universitat de Girona, C/ Maria Aurèlia Capmany 69, 17003 Girona, Spain.

<sup>6</sup>Drug Screening Platform/Biofarma Research Group, CIMUS Research Center. University of Santiago de Compostela (USC), 15782 Santiago de Compostela, Spain.

<sup>7</sup>Small Molecule Discovery Platform, Molecular Therapeutics Program, Center for Applied Medical Research (CIMA), University of Navarra, 31008 Pamplona, Spain.

<sup>8</sup>Department of Pharmacology, Therapeutics and Toxicology, Institute of Neurosciences, Autonomous University of Barcelona, 08193 Bellaterra, Barcelona, Spain.

<sup>9</sup>Institute of Medicinal Chemistry, Spanish National Research Council (CSIC), c/Juan de la Cierva 3, 28006 Madrid, Spain.

<sup>10</sup>Institució Catalana de Recerca i Estudis Avançats (ICREA), 08010 Barcelona, Spain.

<sup>11</sup>Department of Entomology and Nematology and Comprehensive Cancer Center, University of California, Davis, CA 95616, USA.

## Table of contents

|                                                                      |          |
|----------------------------------------------------------------------|----------|
| <sup>1</sup> H and <sup>13</sup> C NMR spectra of compound <b>4</b>  | Page S5  |
| <sup>1</sup> H and <sup>13</sup> C NMR spectra of compound <b>7</b>  | Page S6  |
| <sup>1</sup> H and <sup>13</sup> C NMR spectra of compound <b>9</b>  | Page S7  |
| <sup>1</sup> H and <sup>13</sup> C NMR spectra of compound <b>12</b> | Page S8  |
| <sup>1</sup> H and <sup>13</sup> C NMR spectra of compound <b>14</b> | Page S9  |
| <sup>1</sup> H and <sup>13</sup> C NMR spectra of compound <b>15</b> | Page S10 |
| <sup>1</sup> H and <sup>13</sup> C NMR spectra of compound <b>17</b> | Page S11 |
| <sup>1</sup> H and <sup>13</sup> C NMR spectra of compound <b>18</b> | Page S12 |
| <sup>1</sup> H and <sup>13</sup> C NMR spectra of compound <b>19</b> | Page S13 |
| <sup>1</sup> H and <sup>13</sup> C NMR spectra of compound <b>20</b> | Page S14 |
| <sup>1</sup> H and <sup>13</sup> C NMR spectra of compound <b>21</b> | Page S15 |
| <sup>1</sup> H and <sup>13</sup> C NMR spectra of compound <b>22</b> | Page S16 |
| <sup>1</sup> H and <sup>13</sup> C NMR spectra of compound <b>23</b> | Page S17 |
| <sup>1</sup> H and <sup>13</sup> C NMR spectra of compound <b>24</b> | Page S18 |
| <sup>1</sup> H and <sup>13</sup> C NMR spectra of compound <b>25</b> | Page S19 |
| <sup>1</sup> H and <sup>13</sup> C NMR spectra of compound <b>26</b> | Page S20 |
| <sup>1</sup> H and <sup>13</sup> C NMR spectra of compound <b>27</b> | Page S21 |
| <sup>1</sup> H and <sup>13</sup> C NMR spectra of compound <b>28</b> | Page S22 |
| <sup>1</sup> H and <sup>13</sup> C NMR spectra of compound <b>29</b> | Page S23 |
| <sup>1</sup> H and <sup>13</sup> C NMR spectra of compound <b>30</b> | Page S24 |
| <sup>1</sup> H and <sup>13</sup> C NMR spectra of compound <b>31</b> | Page S25 |
| <sup>1</sup> H and <sup>13</sup> C NMR spectra of compound <b>32</b> | Page S26 |
| HPLC/Ms data of compound <b>15</b>                                   | Page S27 |
| HPLC/Ms data of compound <b>27</b>                                   | Page S28 |
| HPLC/Ms data of compound <b>29</b>                                   | Page S29 |
| HPLC/Ms data of compound <b>32</b>                                   | Page S30 |
| Table S1: Elemental analysis data.                                   | Page S31 |
| Table S2: Cytochromes and hERG inhibition.                           | Page S32 |
| Table S3: <i>h</i> COX-2 and <i>h</i> LOX-5 inhibition.              | Page S32 |

|                                                                                                                             |          |
|-----------------------------------------------------------------------------------------------------------------------------|----------|
| Table S4: Concentrations of <b>22</b> in mouse plasma iv administration.                                                    | Page S33 |
| Table S5: Concentrations of <b>22</b> in mouse plasma ip administration.                                                    | Page S34 |
| Figure S1: Representation of the noncovalent interactions at the active site of sEH in the presence of compound <b>22</b> . | Page S35 |
| Figure S2: Concentration <i>vs</i> time for ip and iv administration of <b>22</b> .                                         | Page S36 |
| Figure S3: Experimental procedures of the <i>in vivo</i> efficacy studies.                                                  | Page S36 |

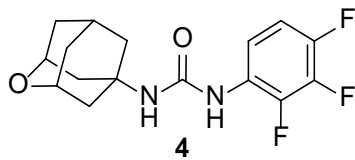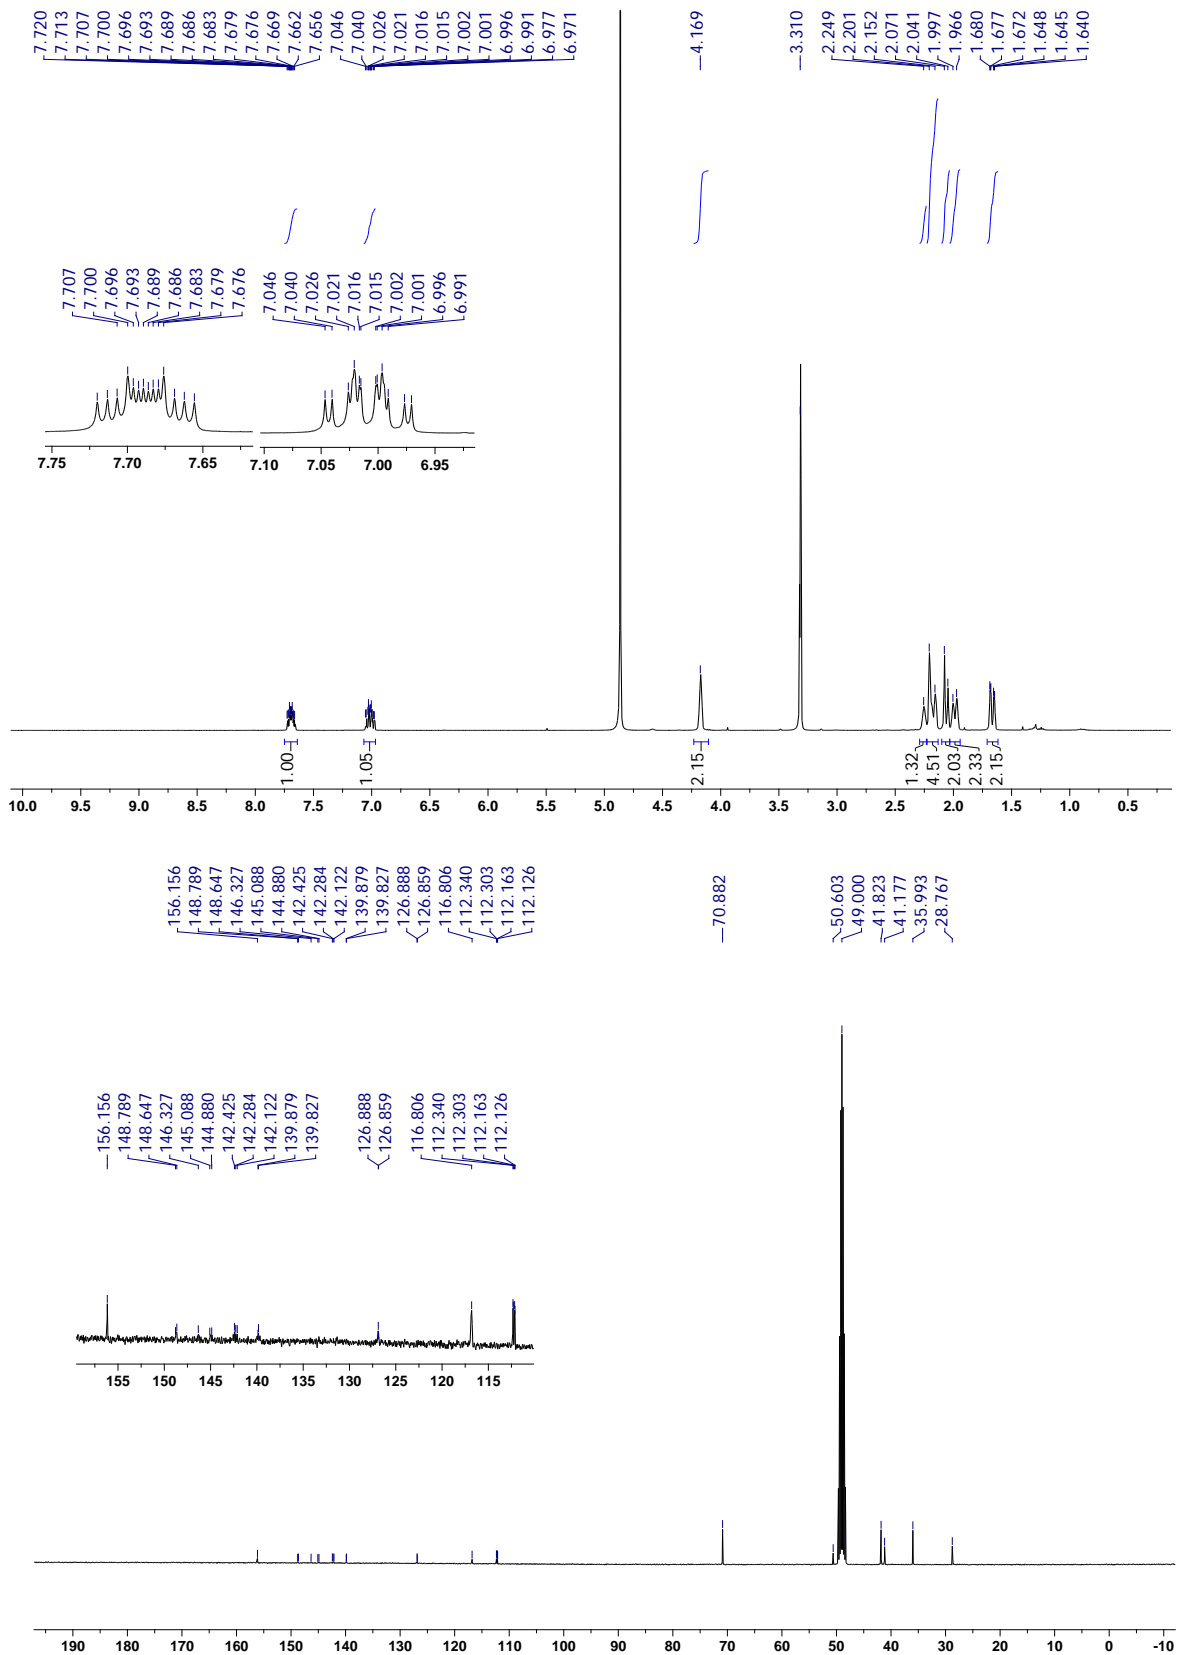

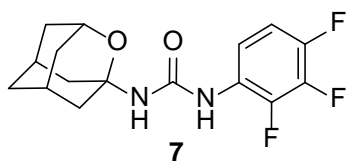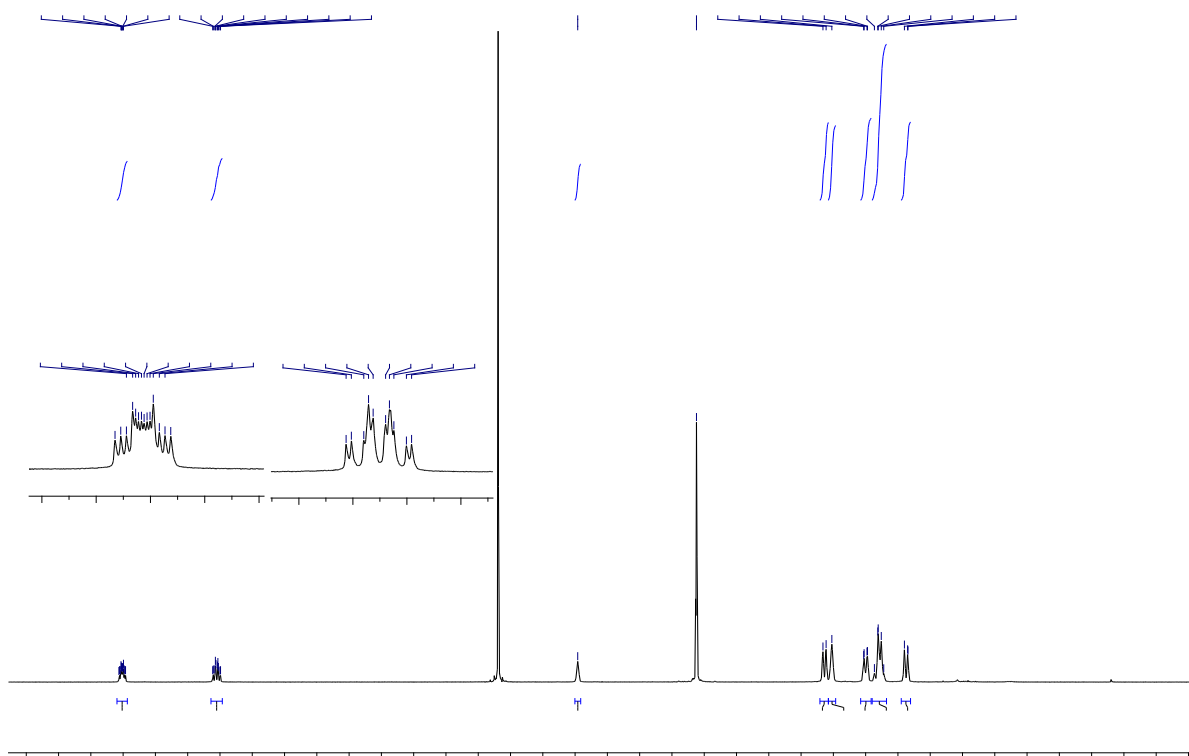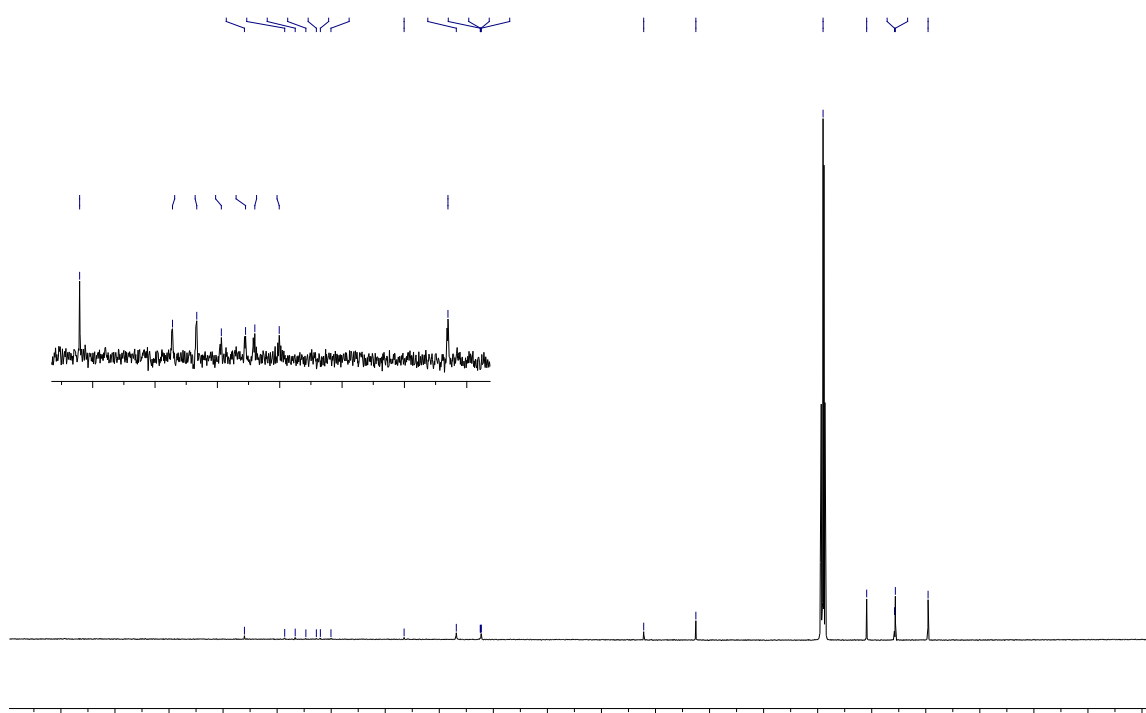

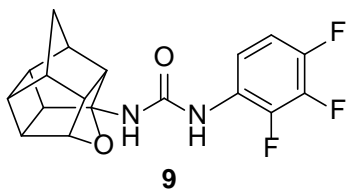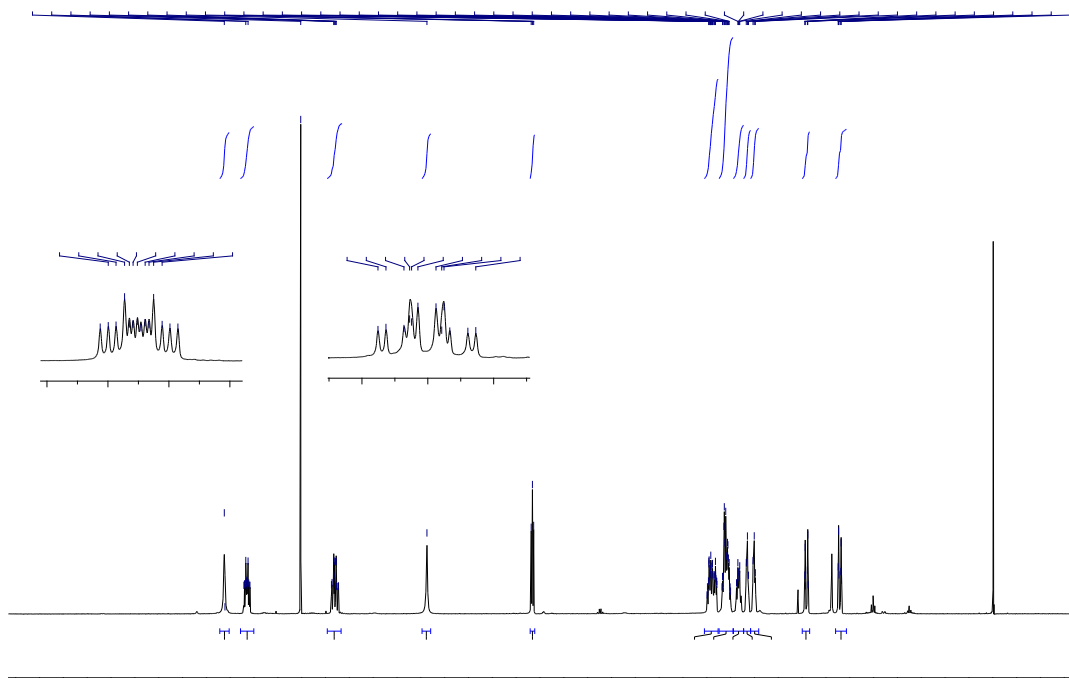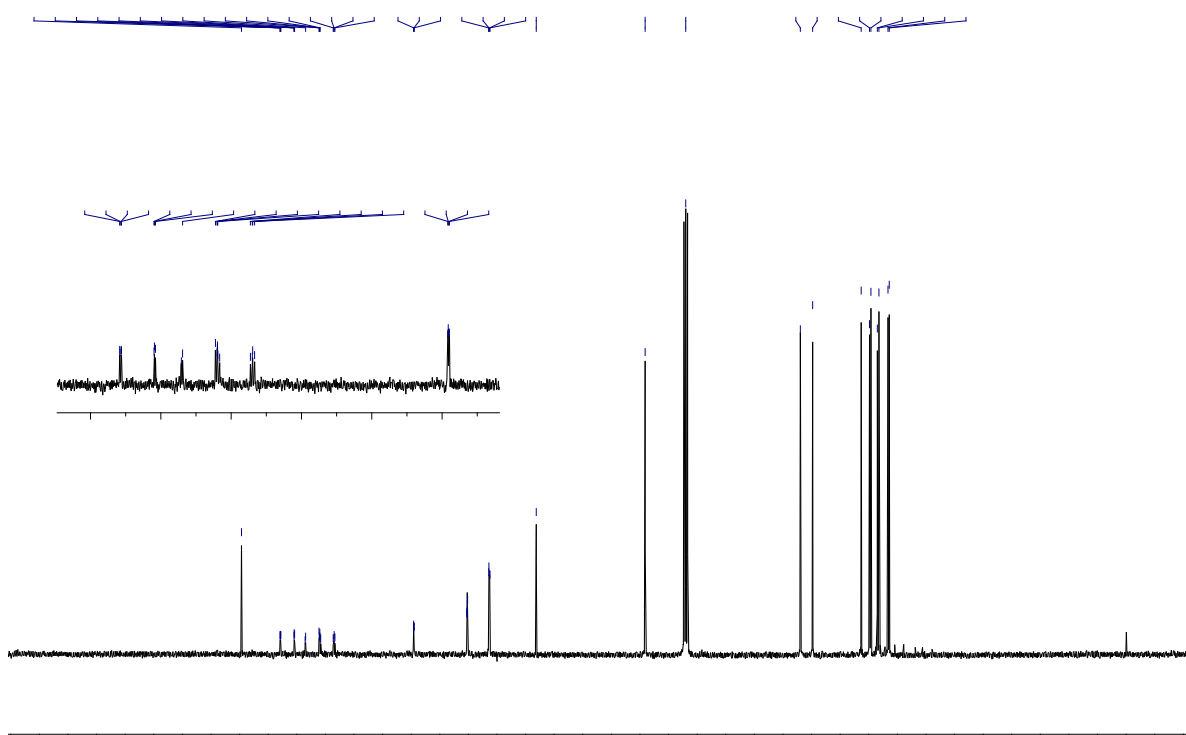

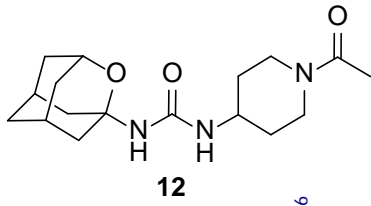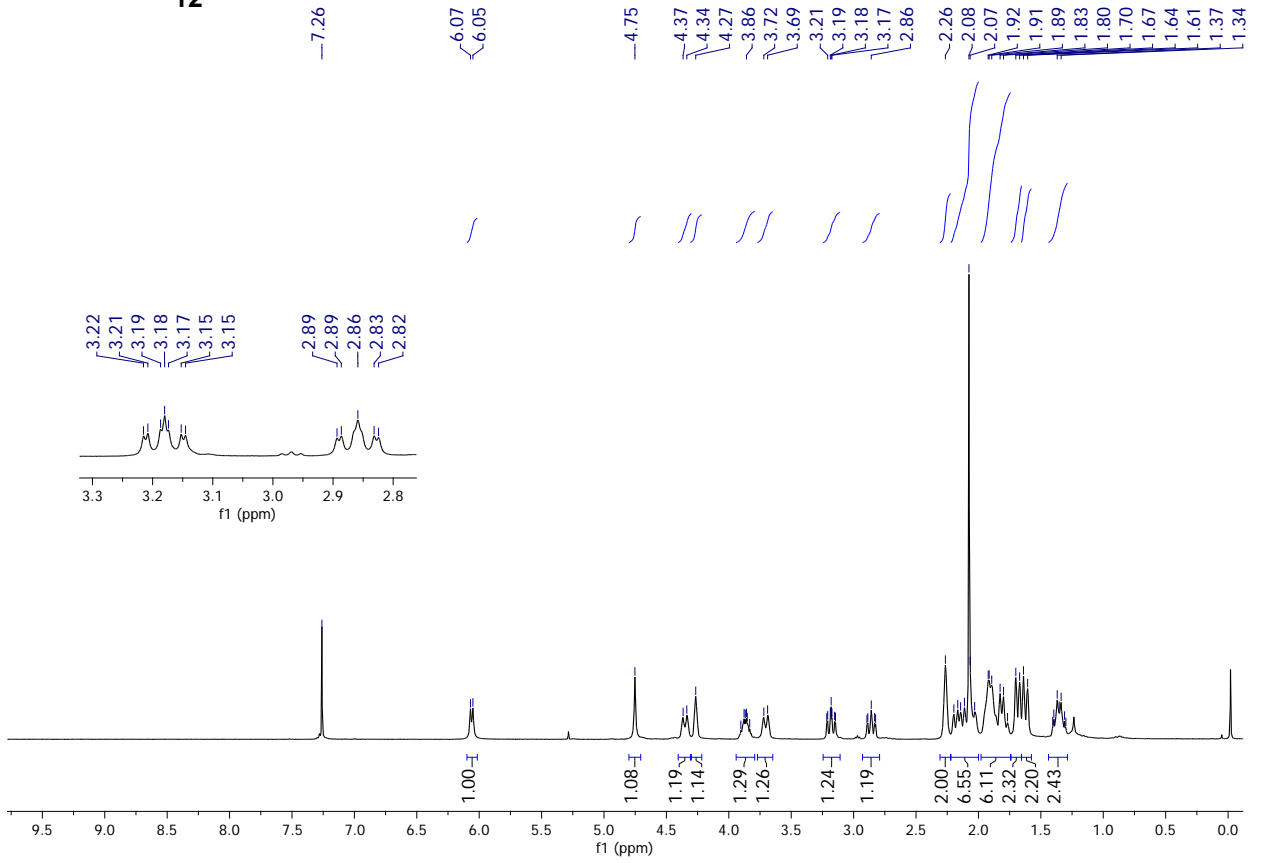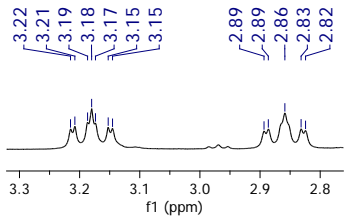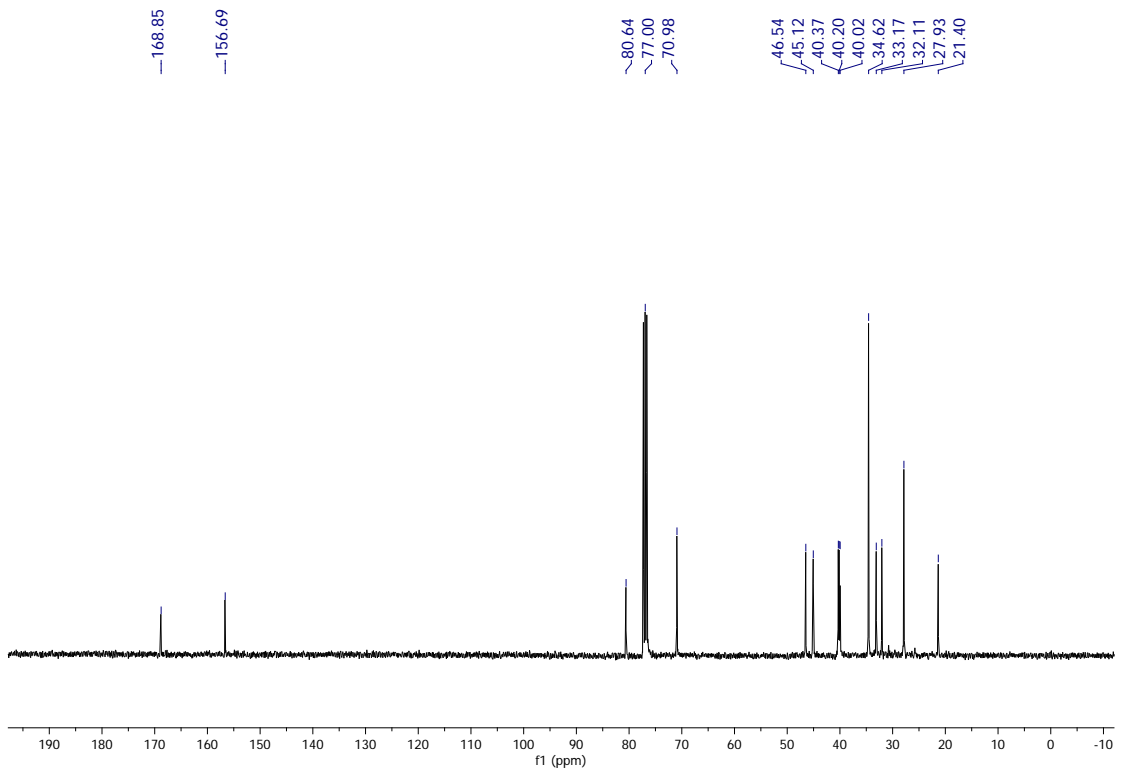



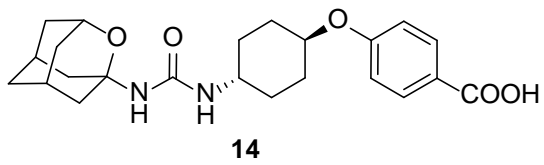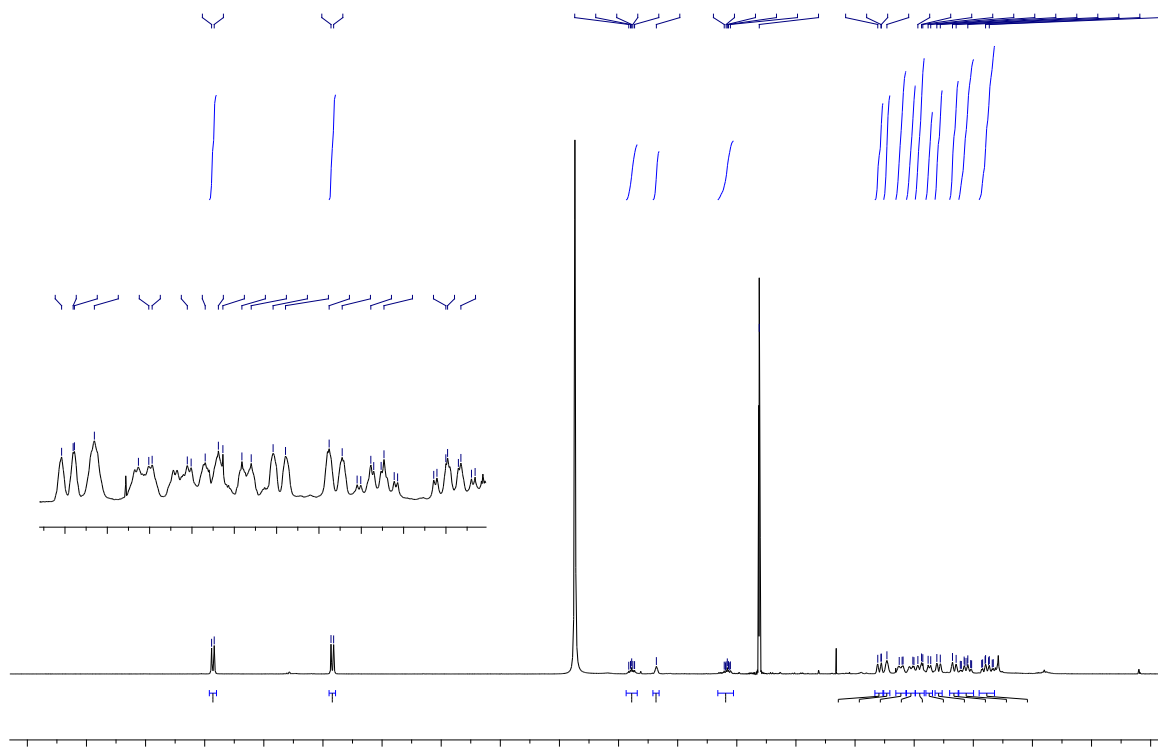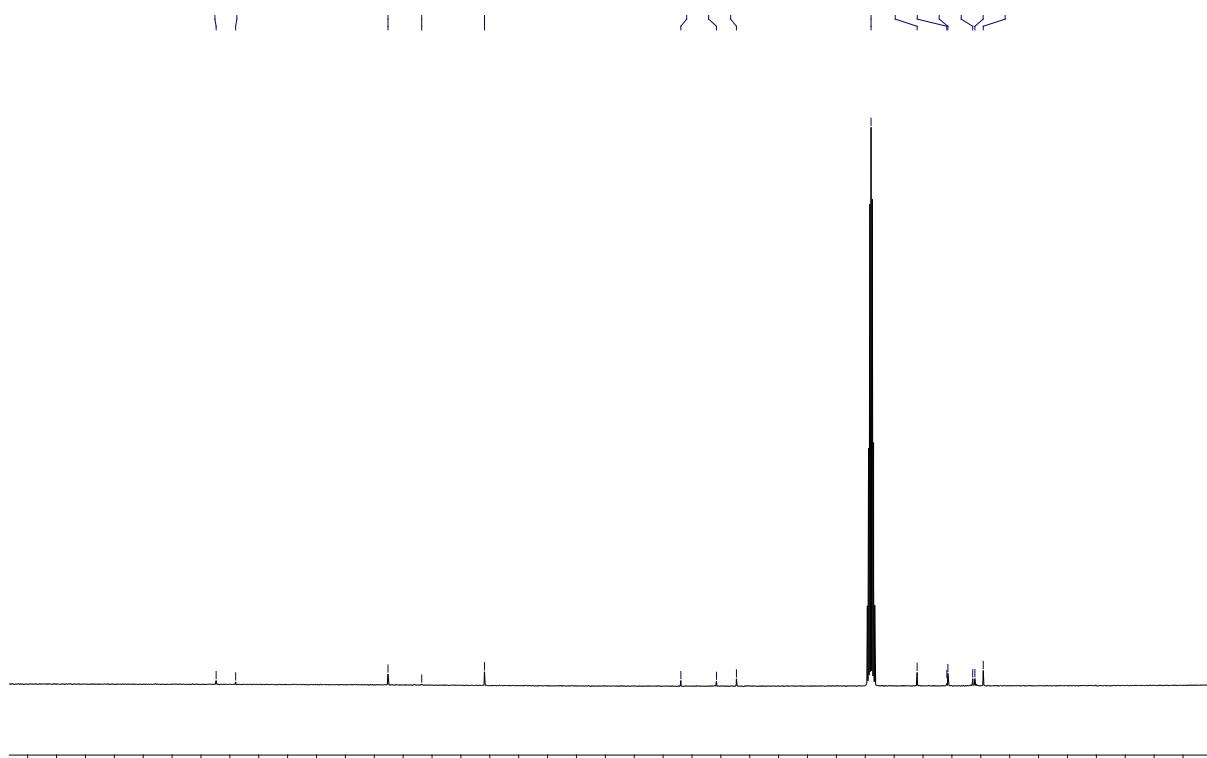

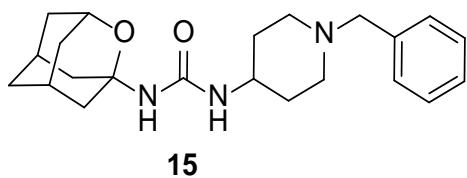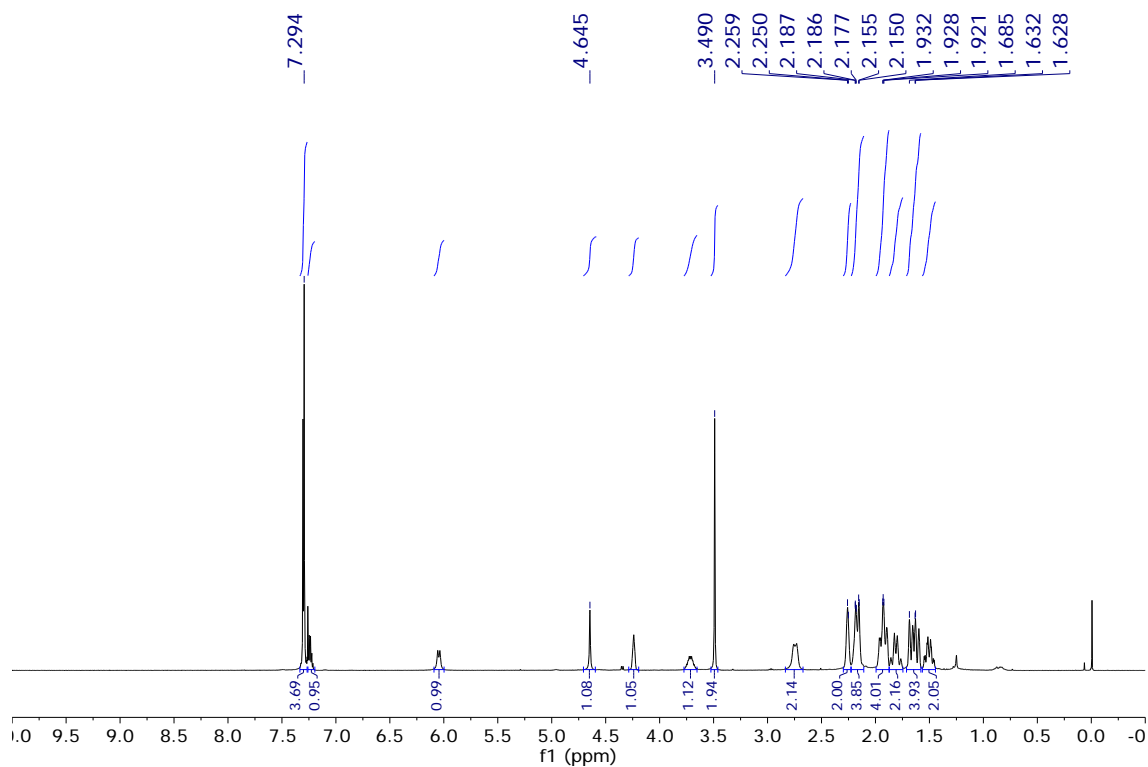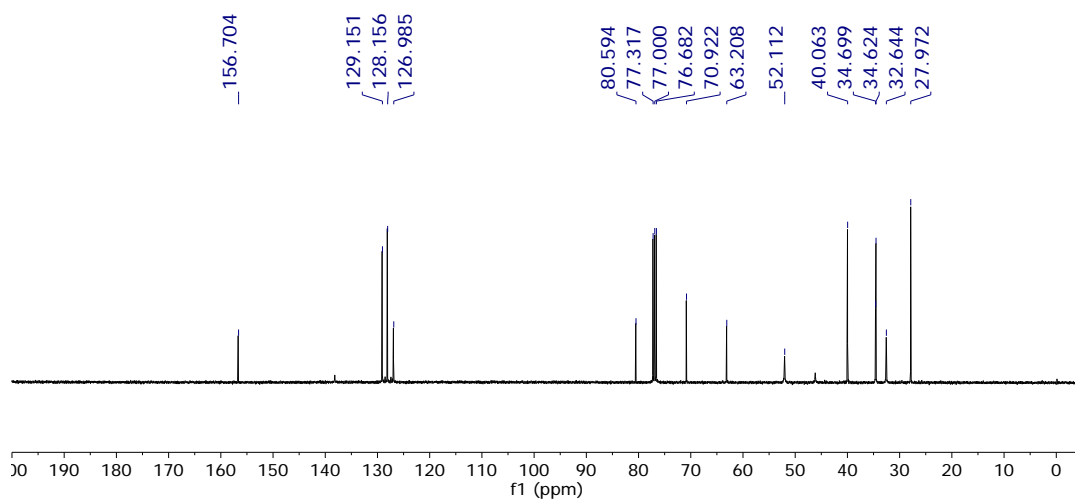

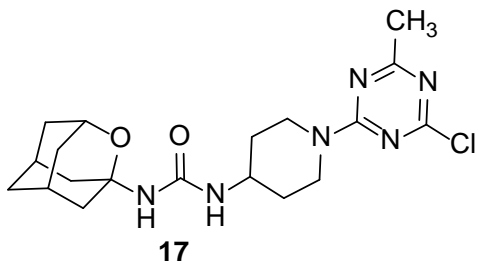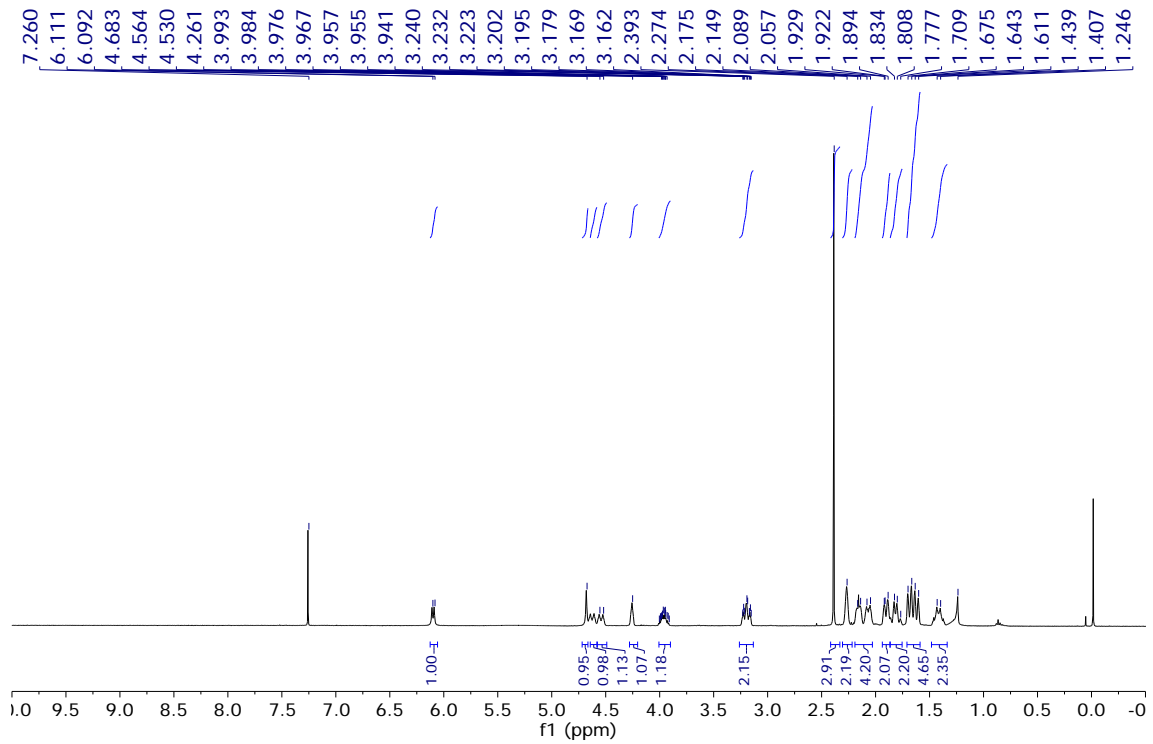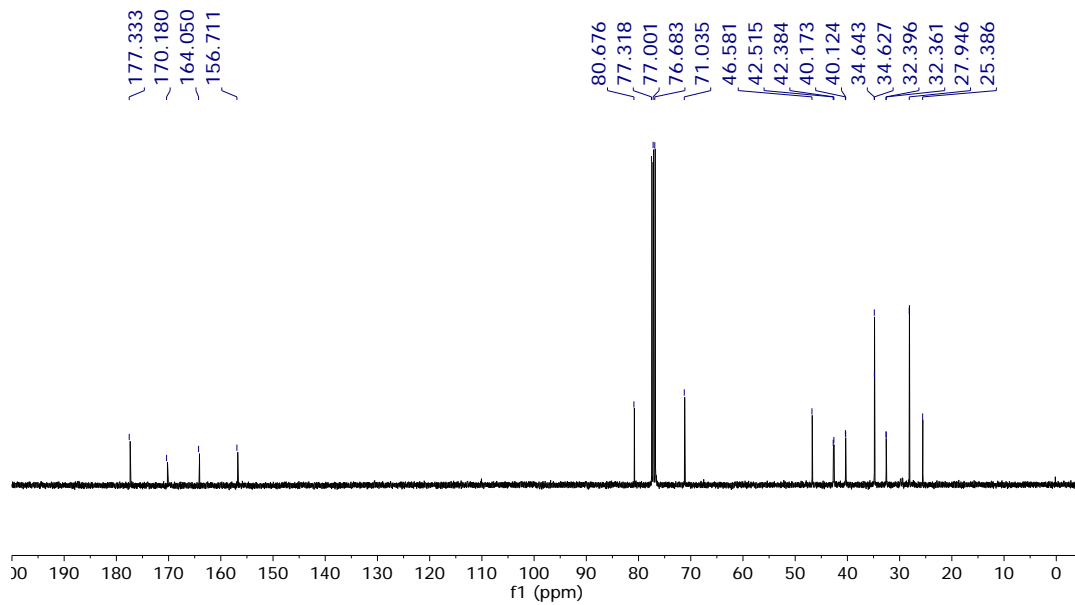

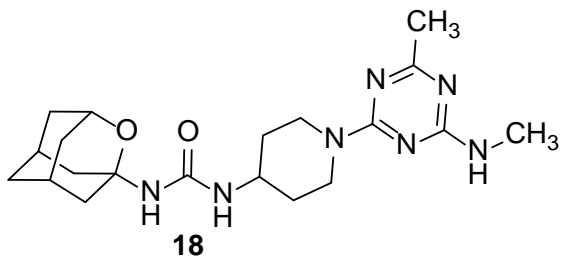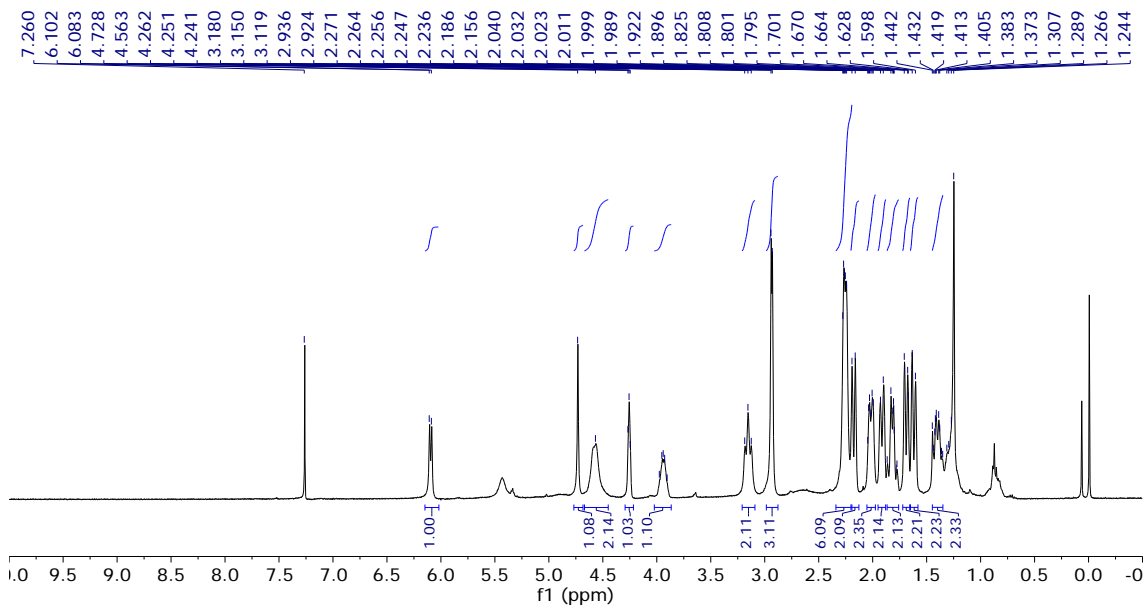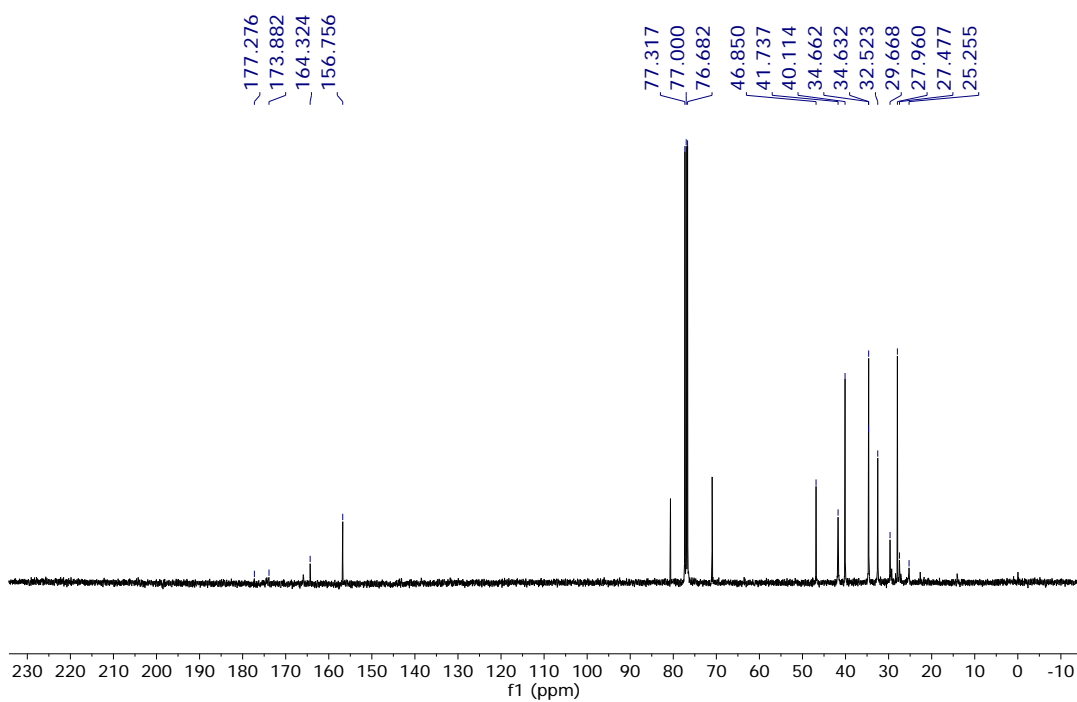

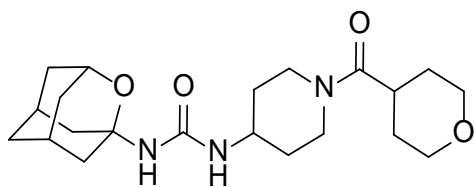

19

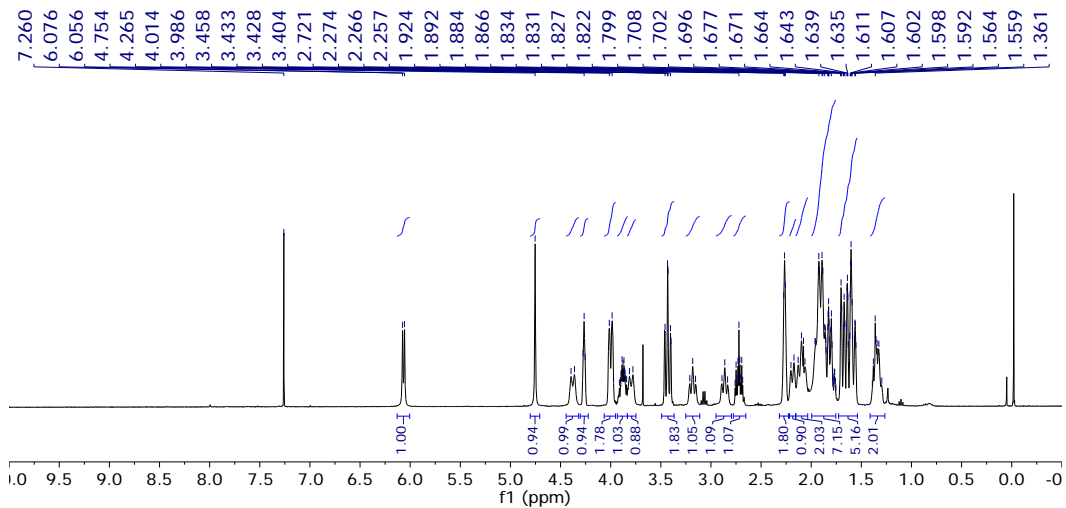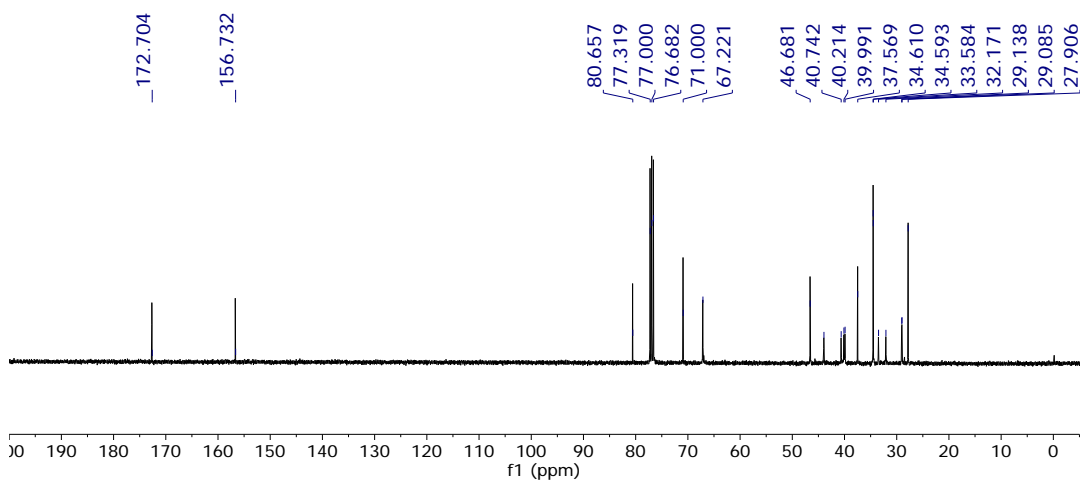

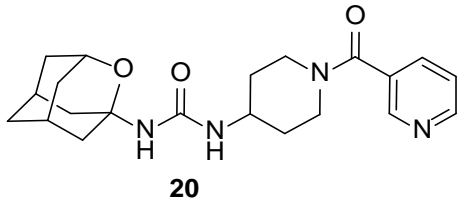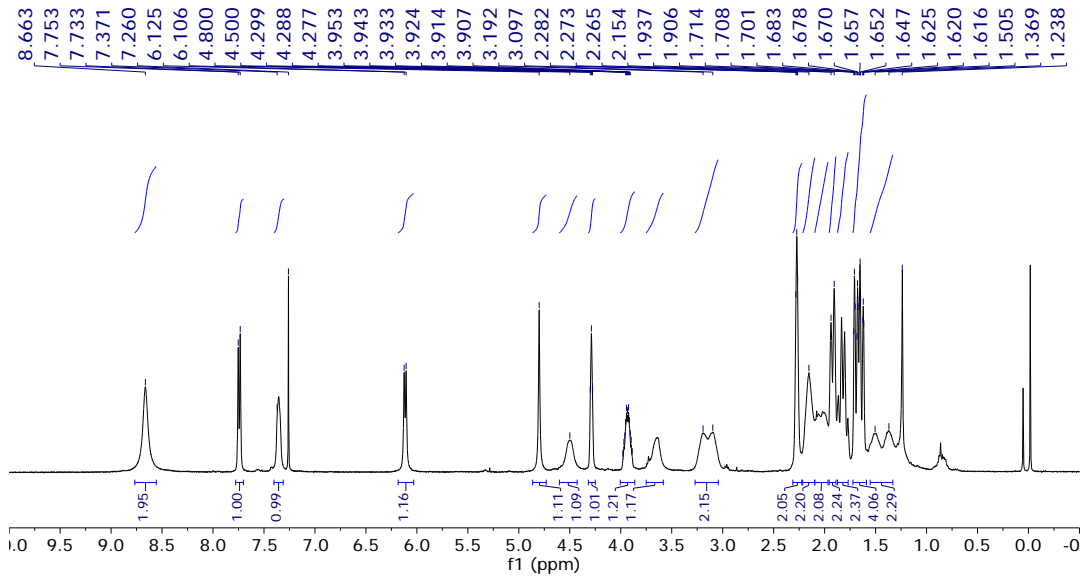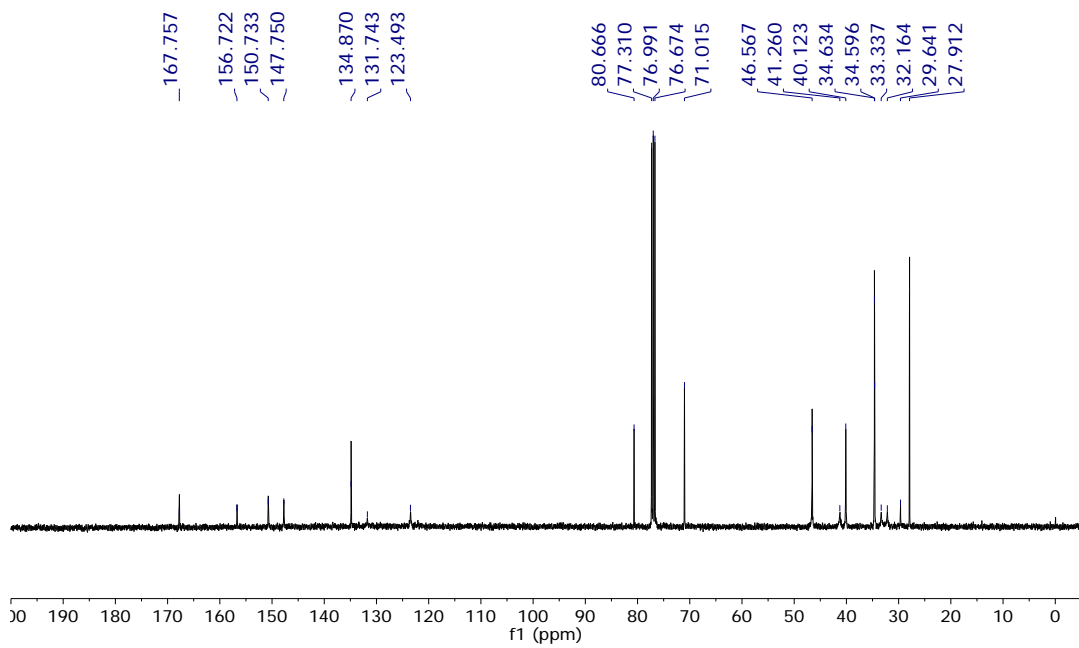

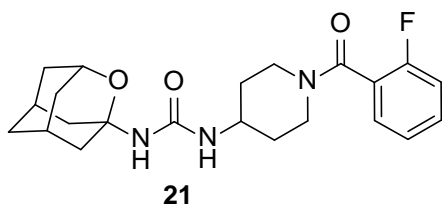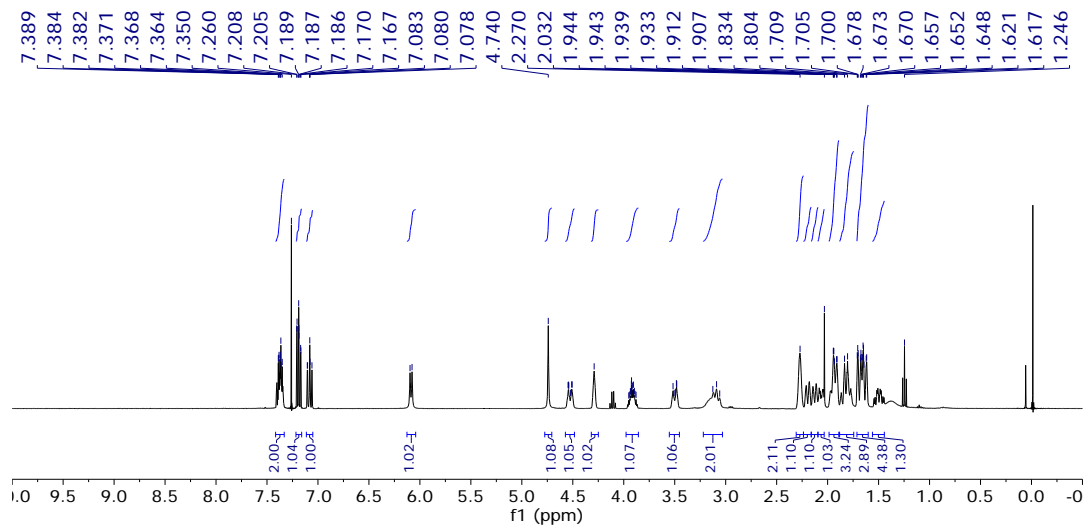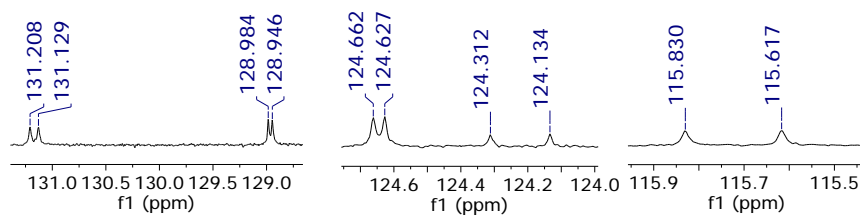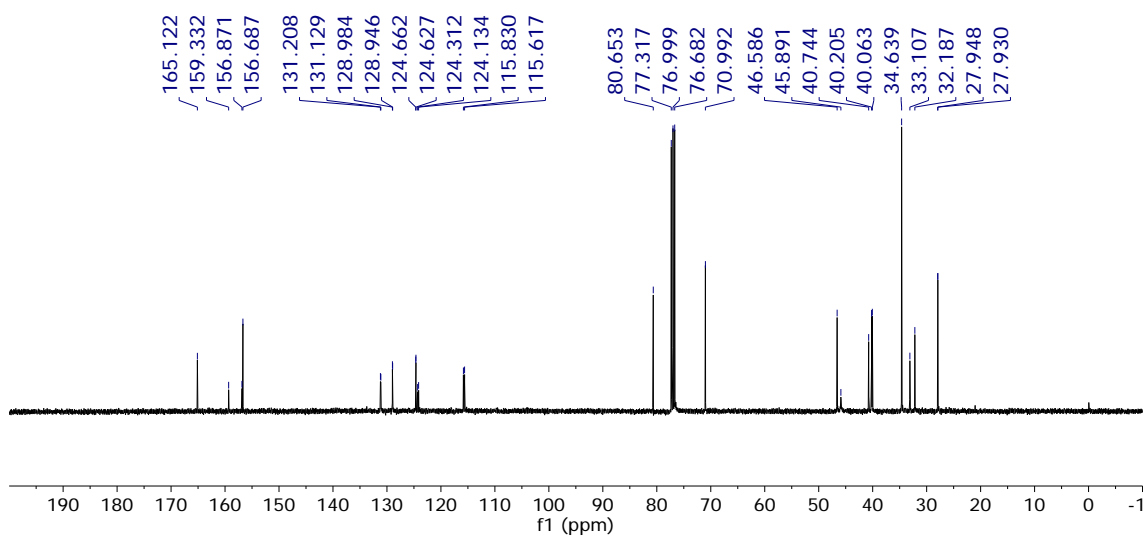

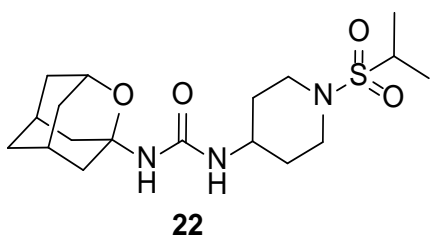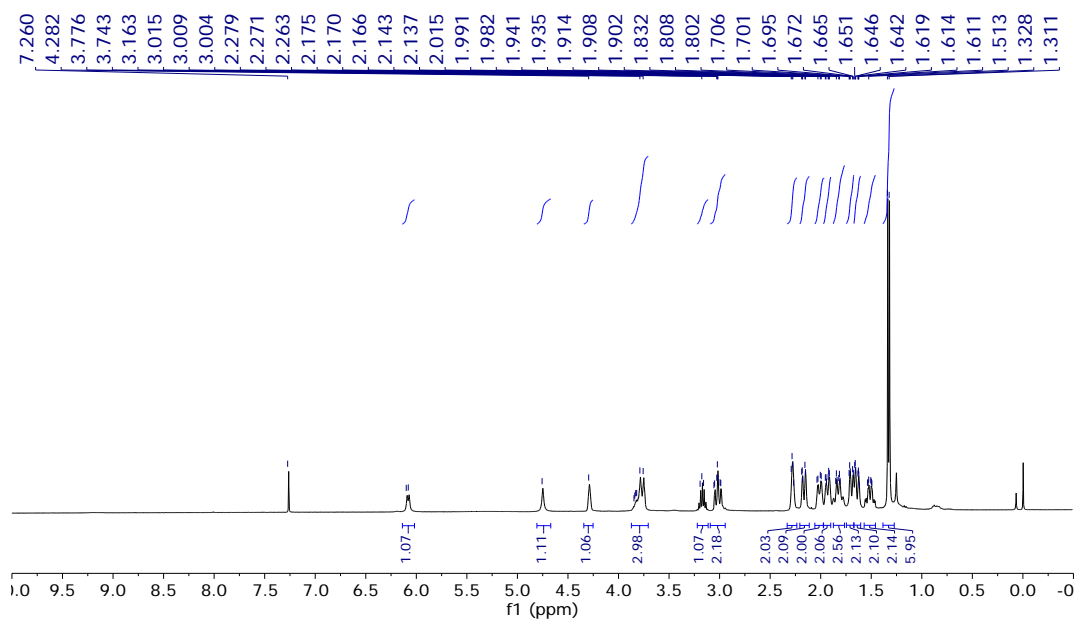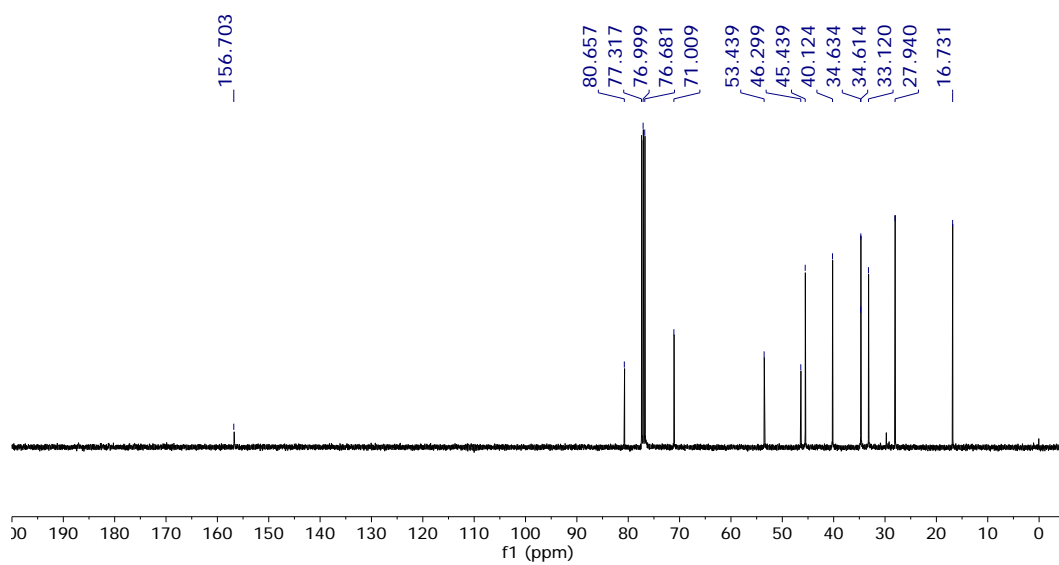



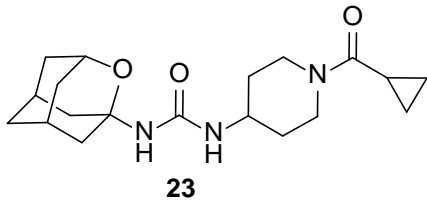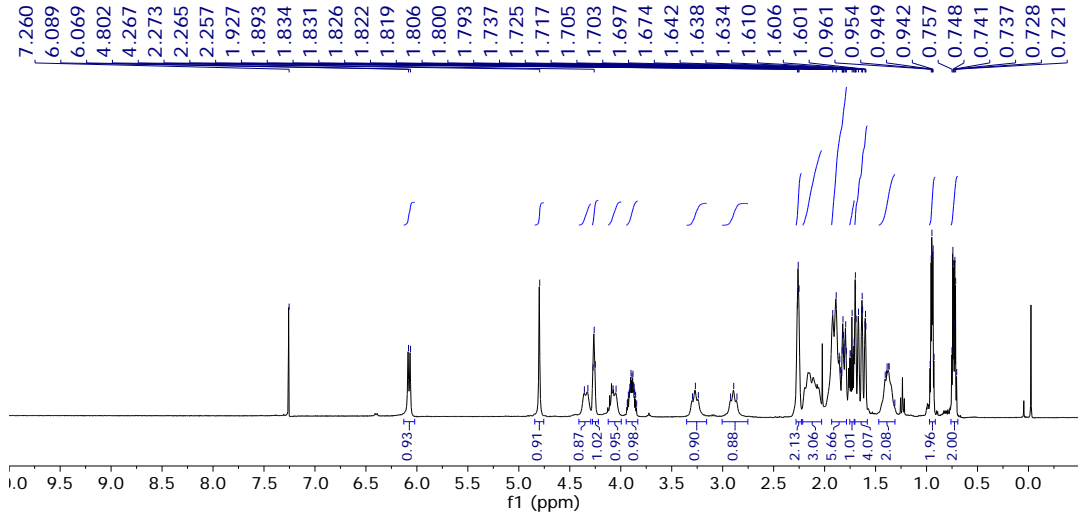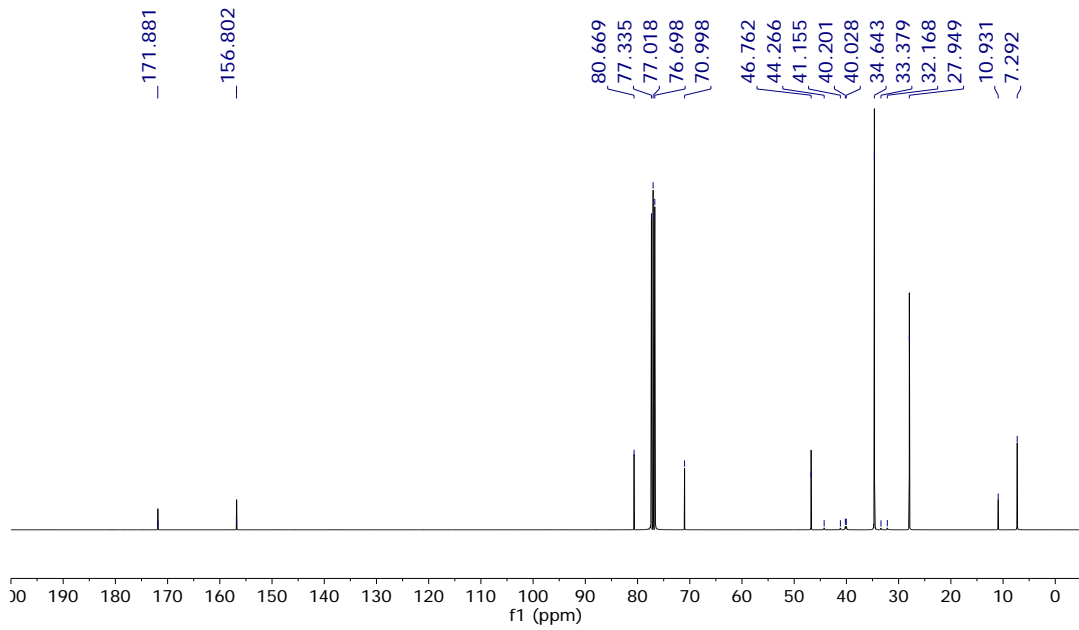

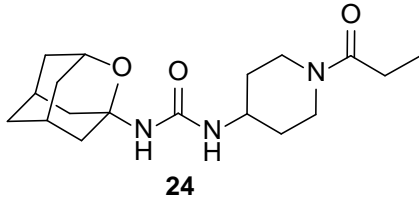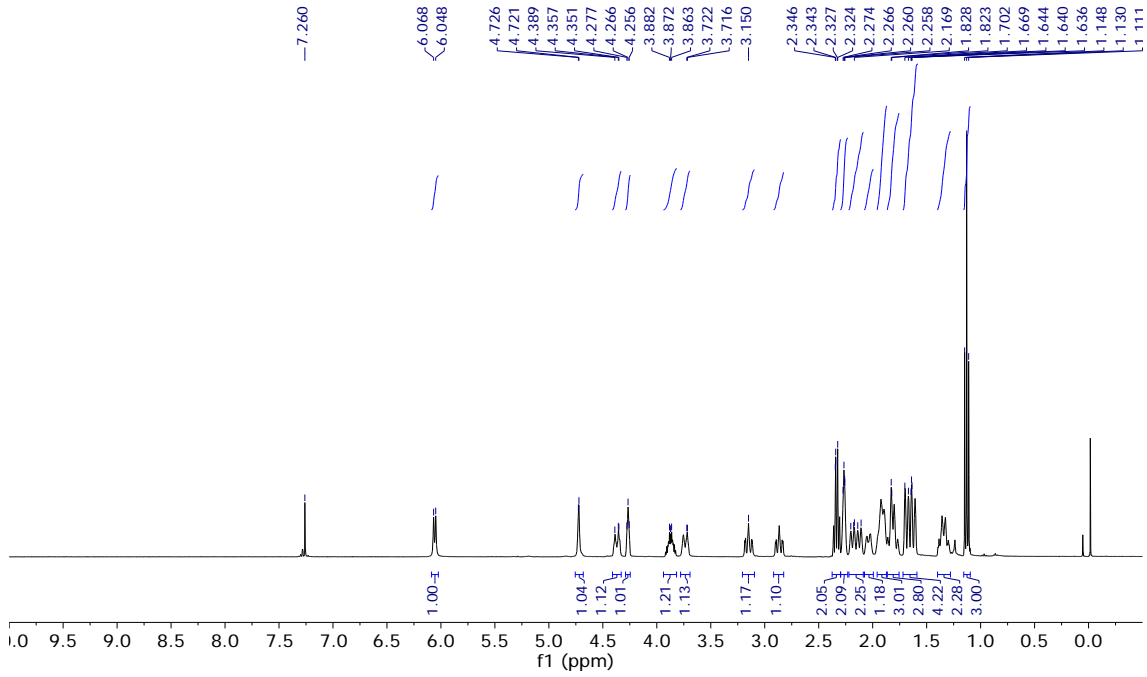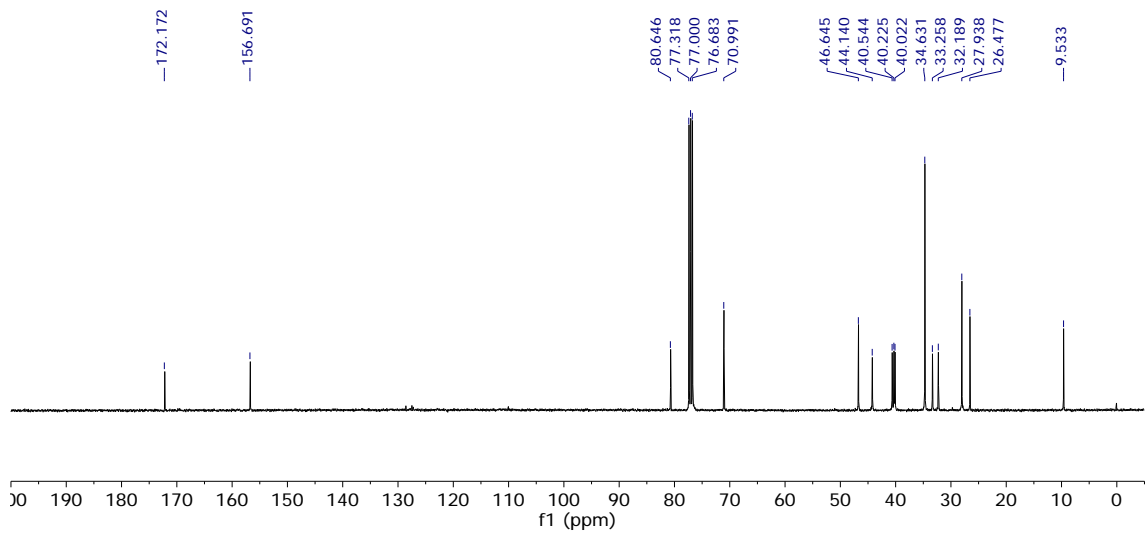

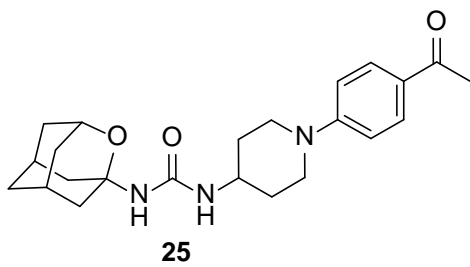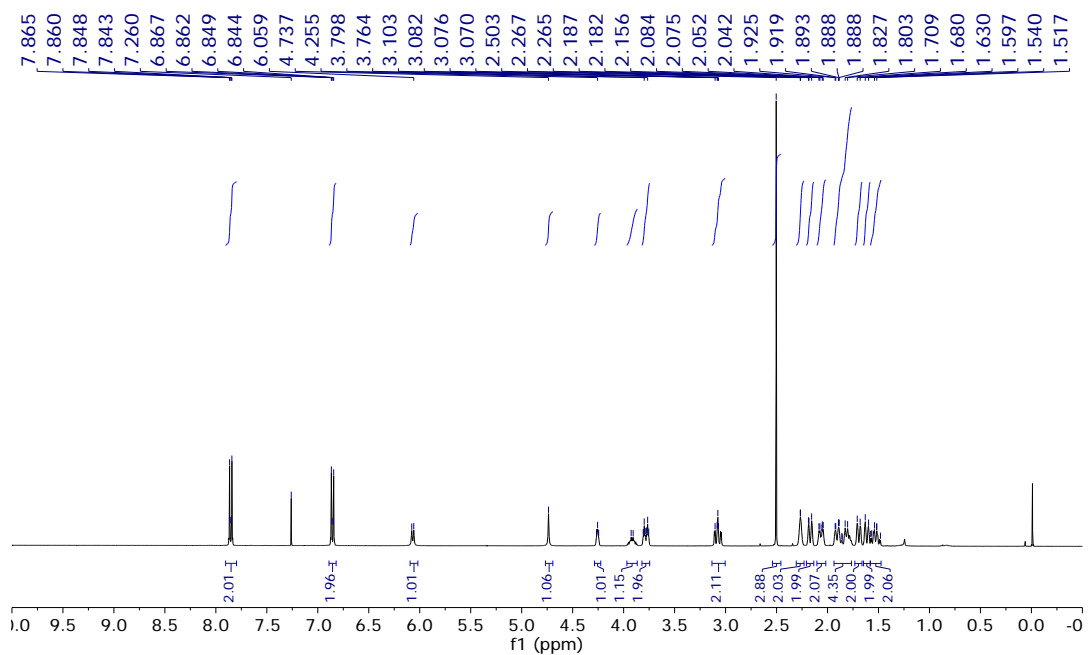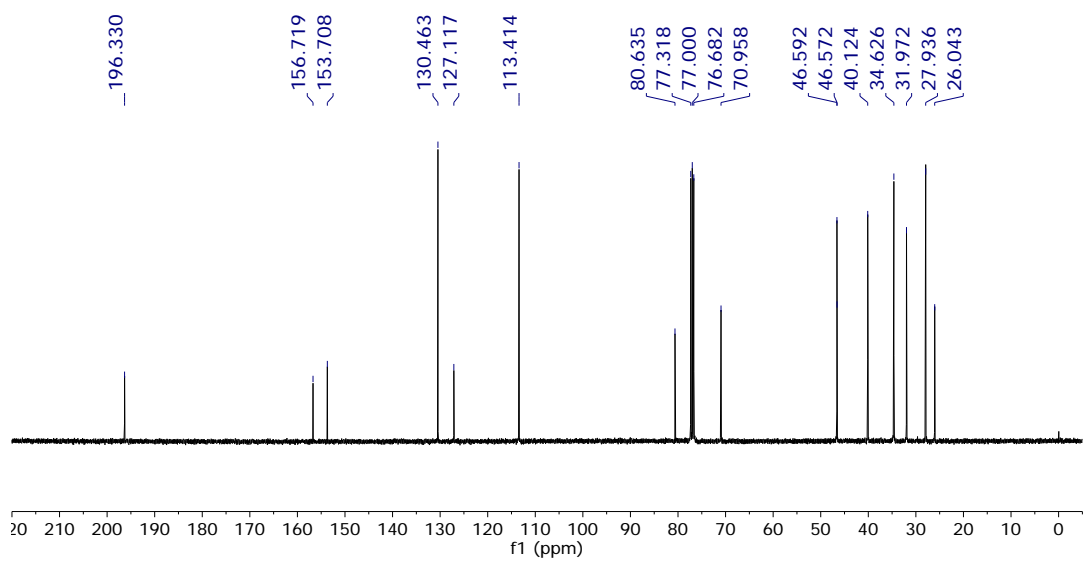

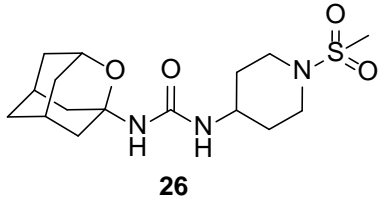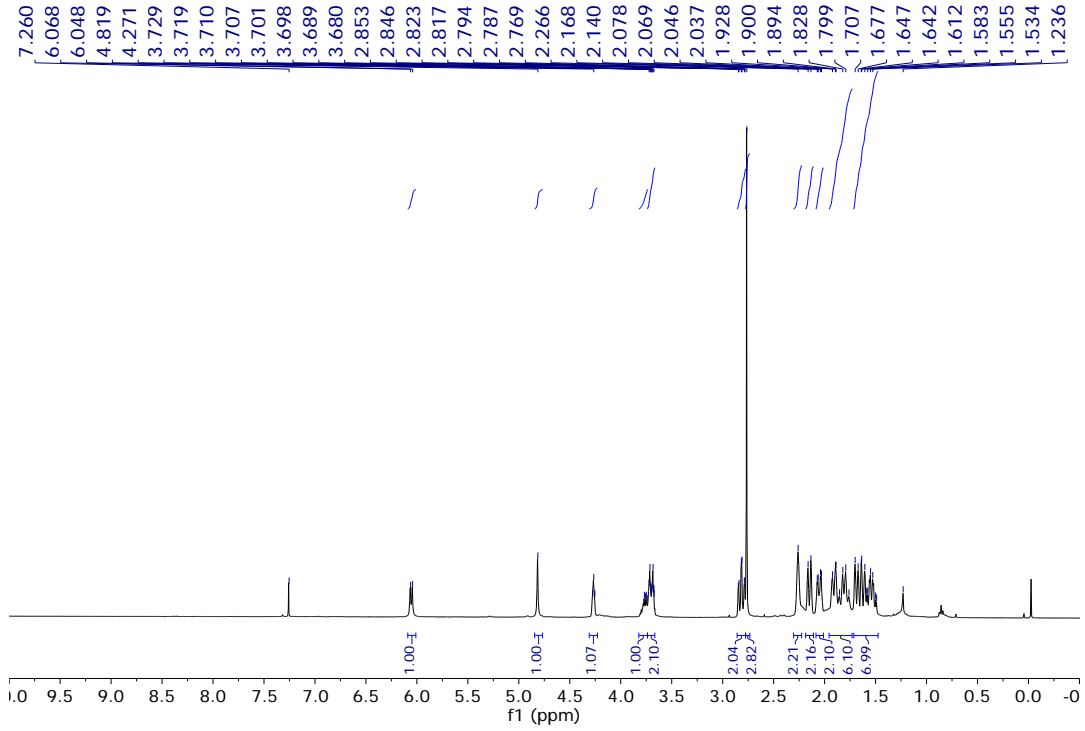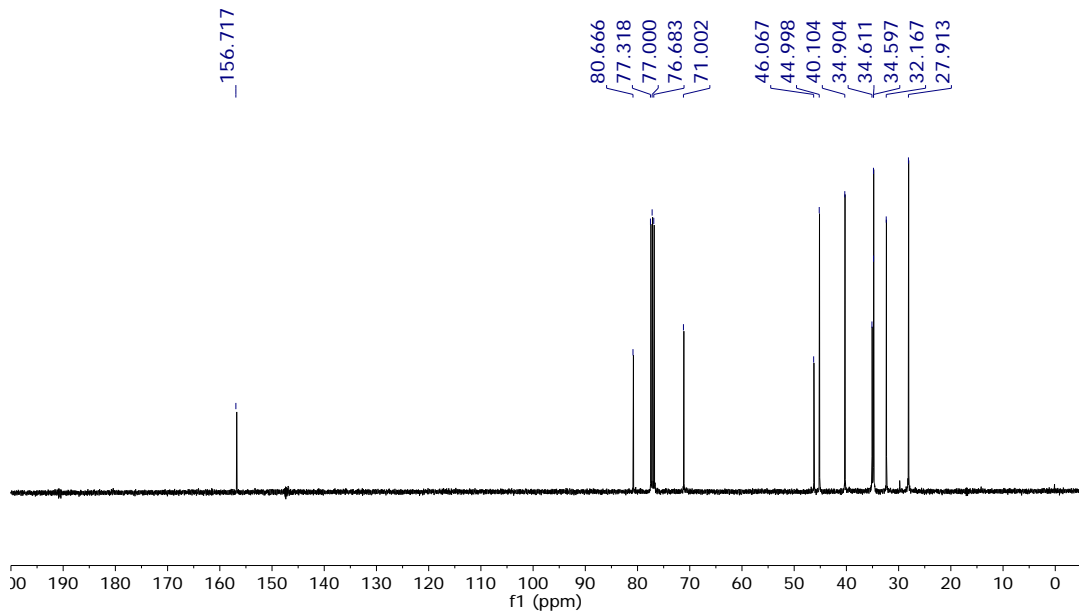

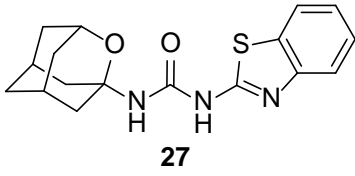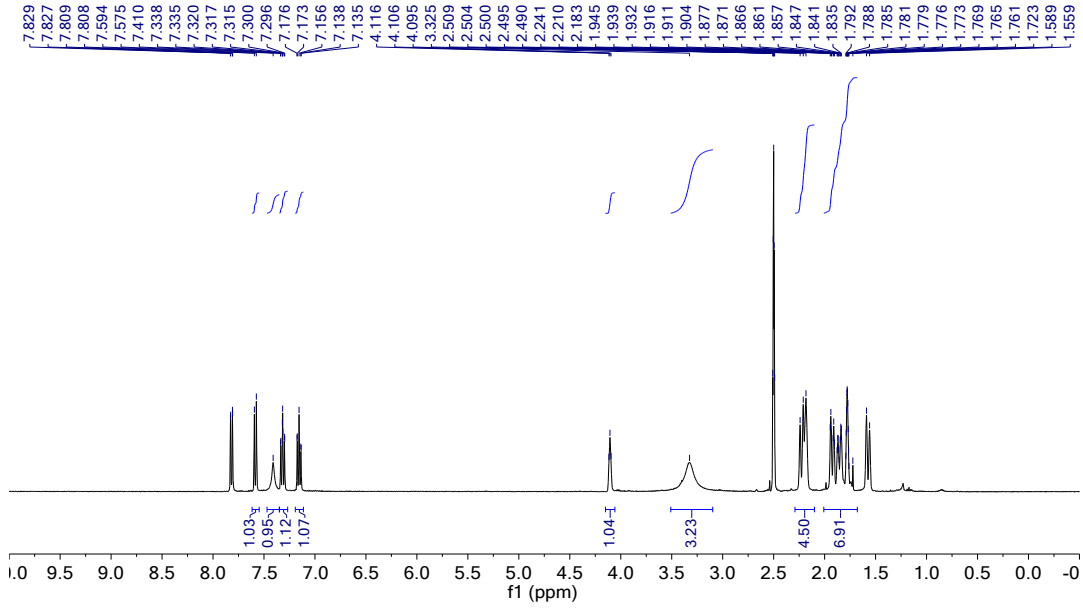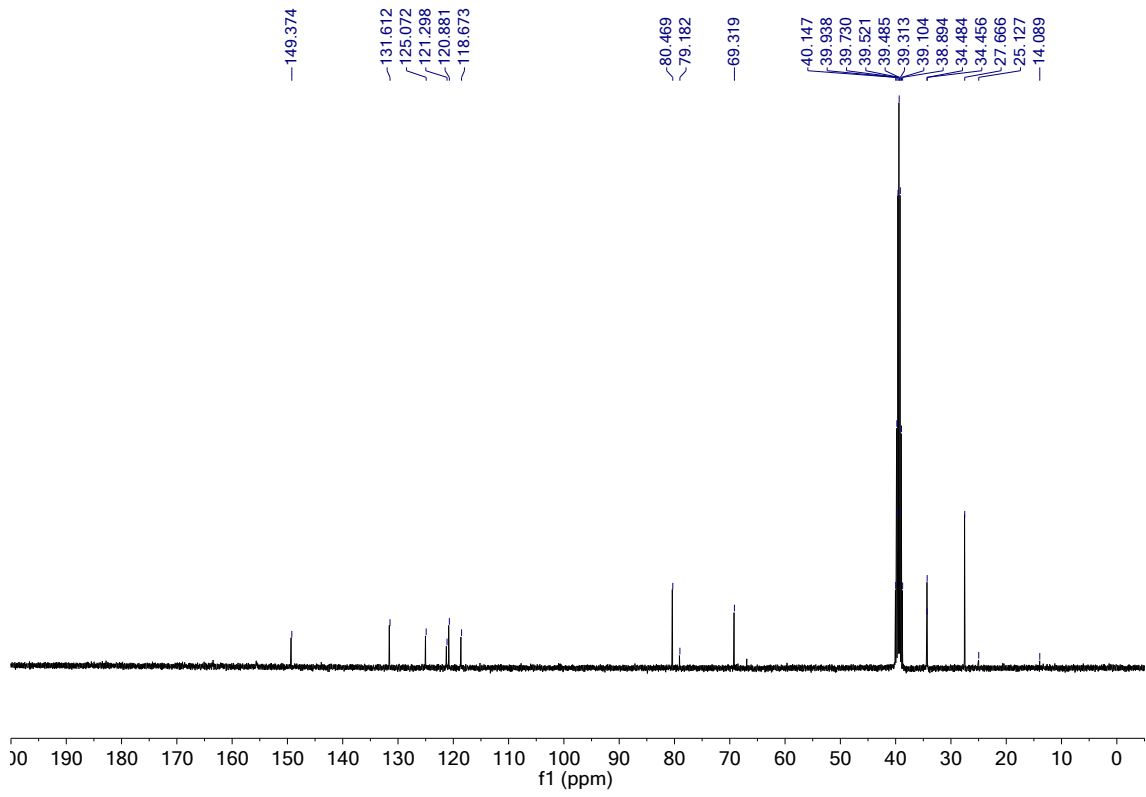

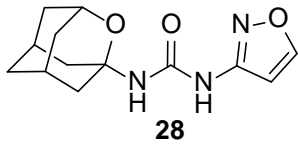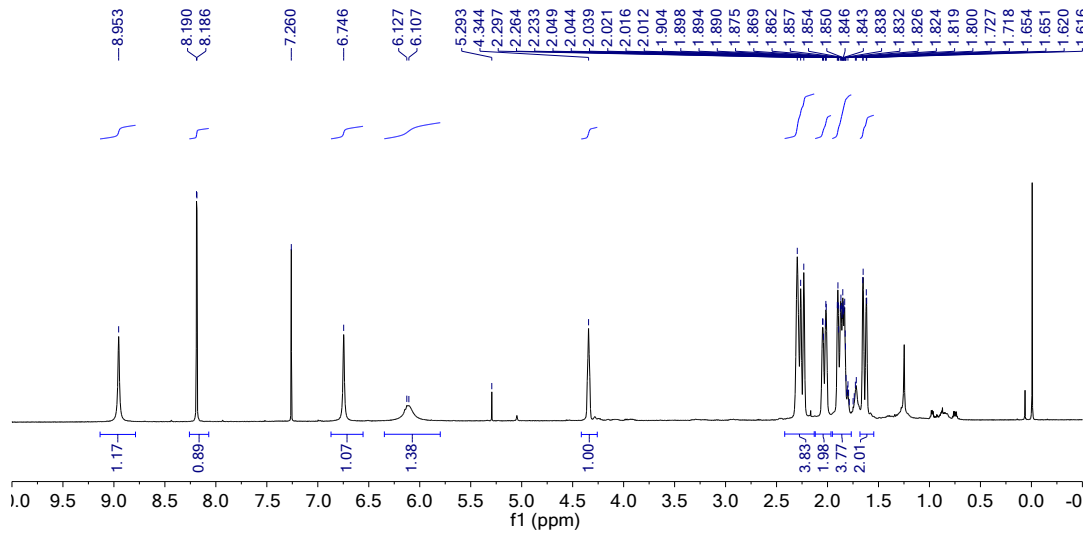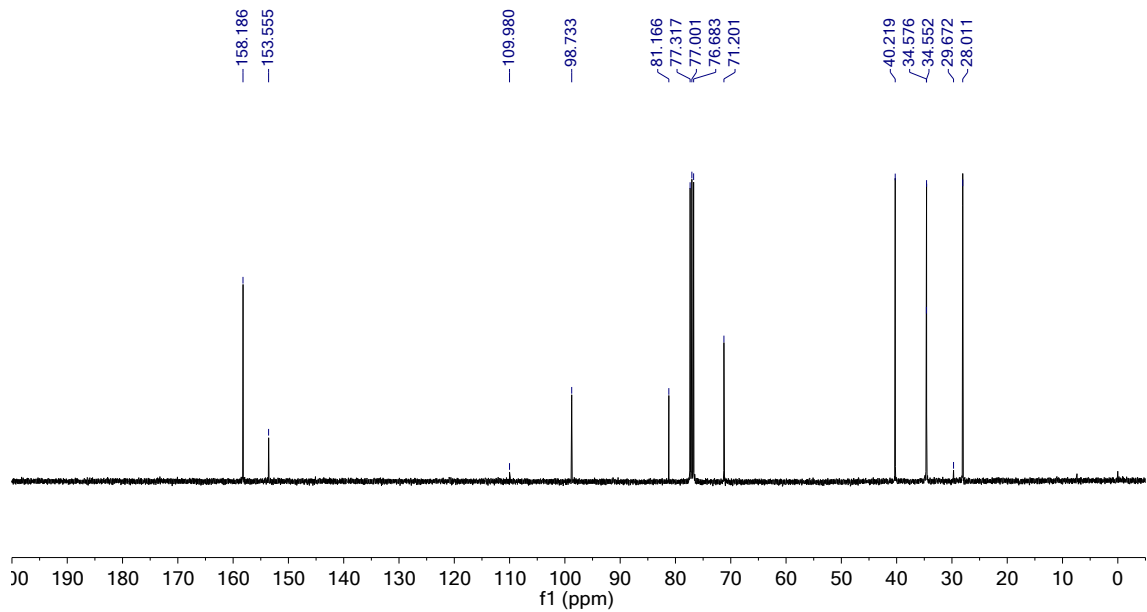

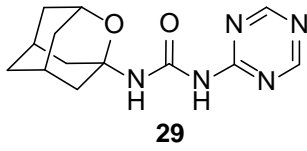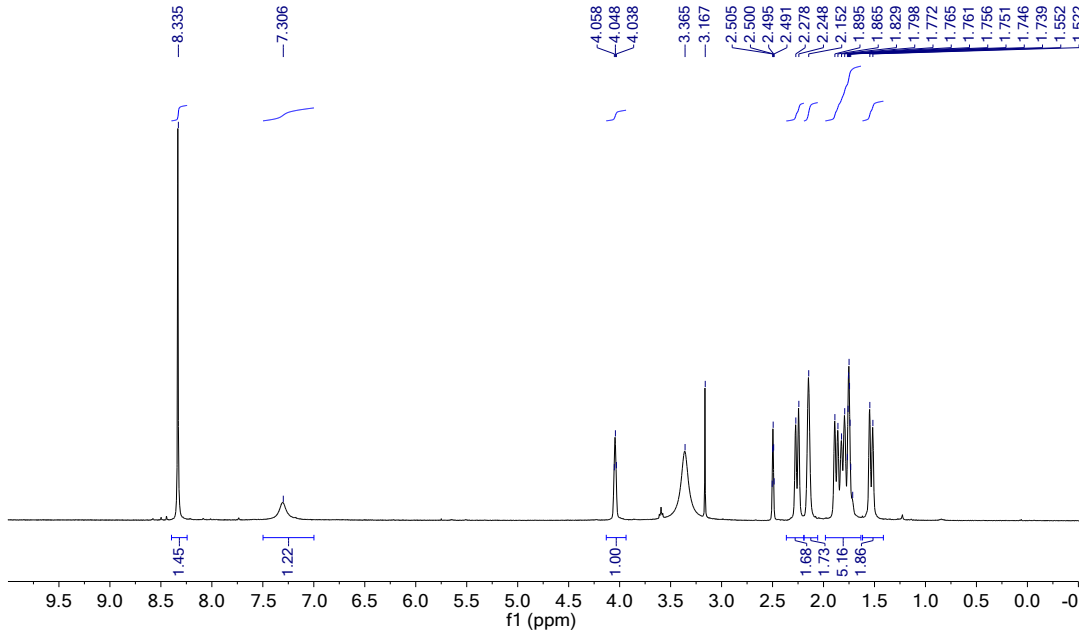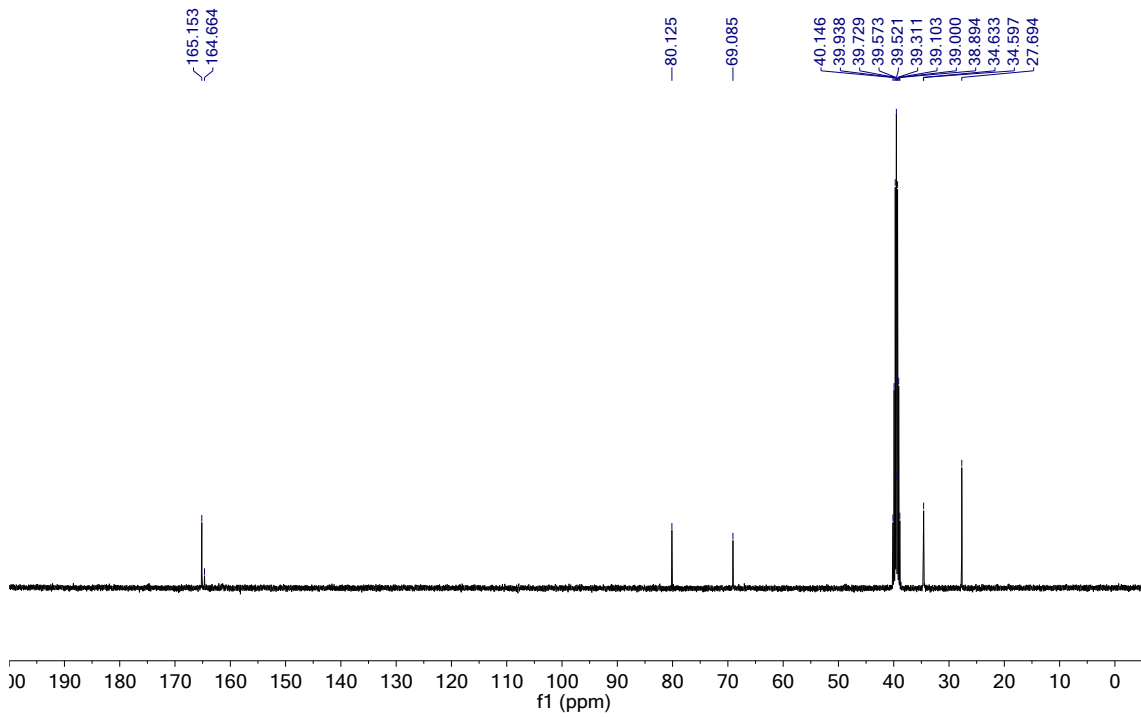

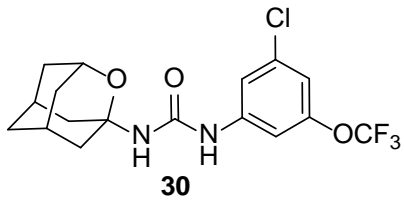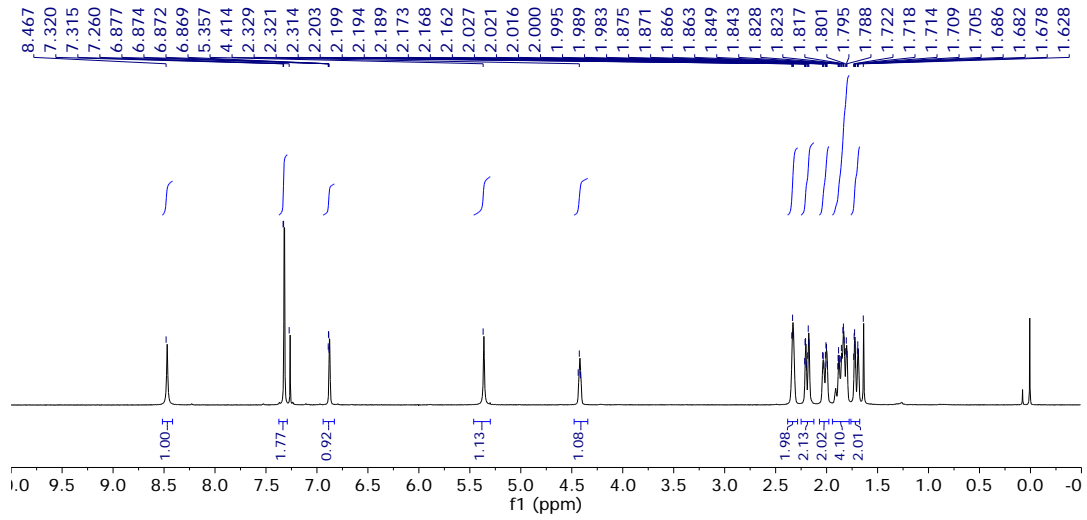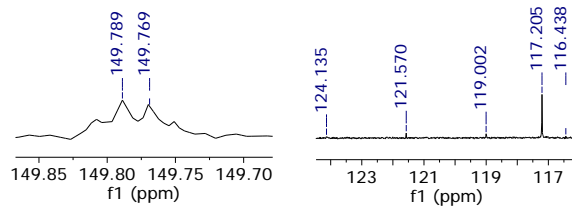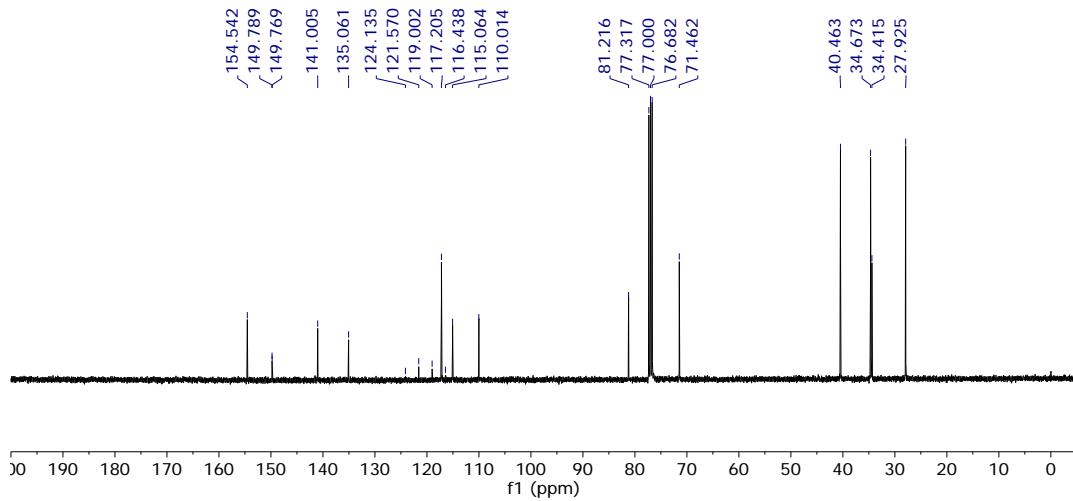



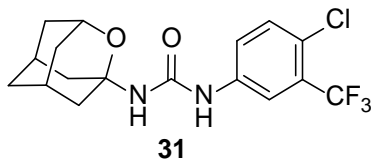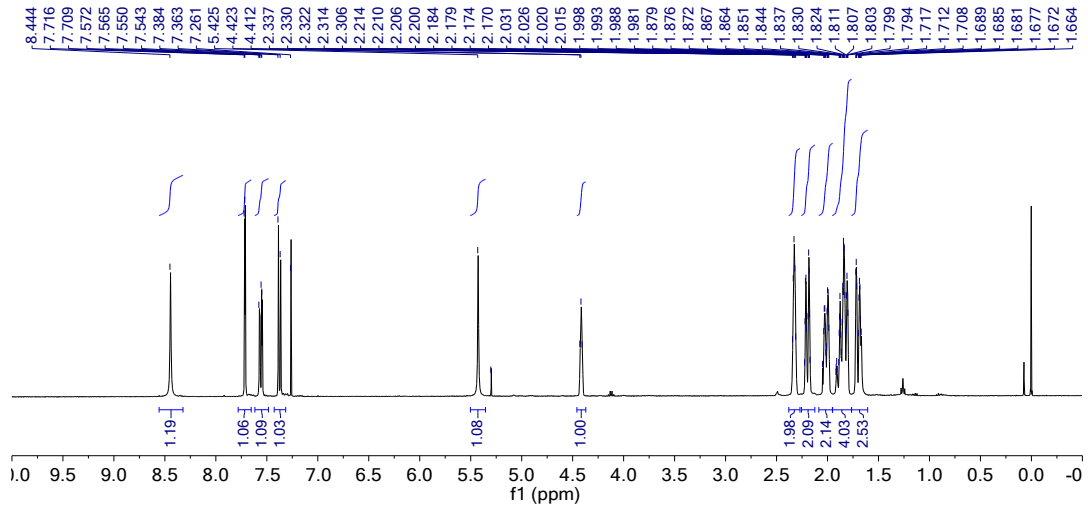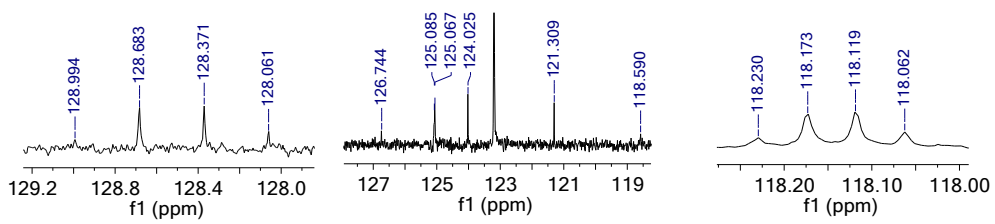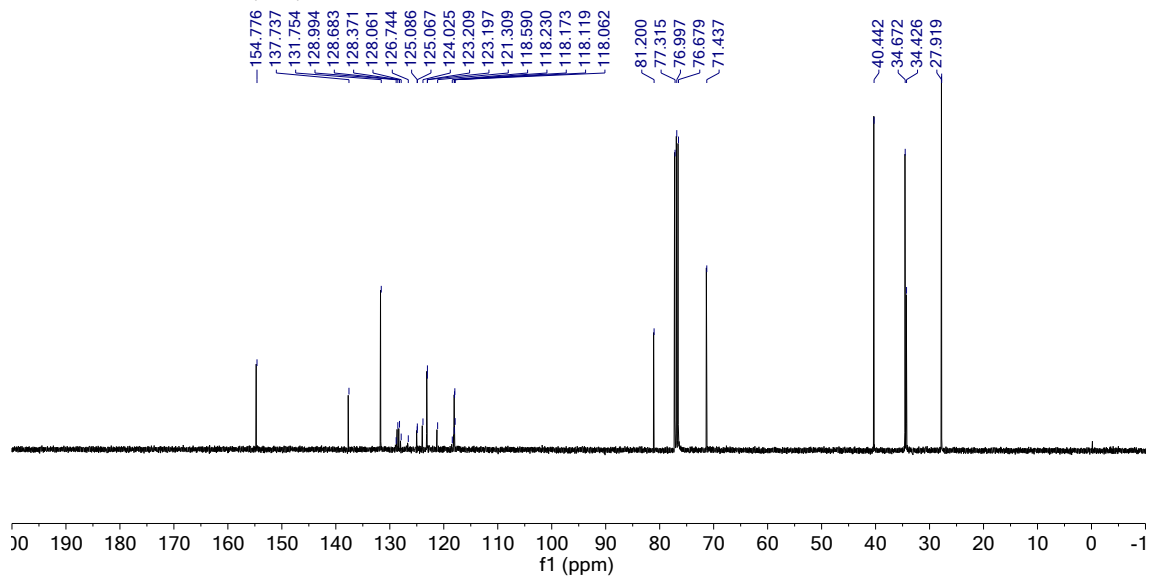

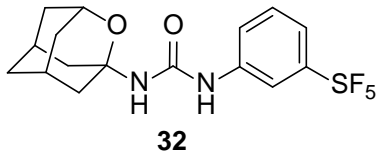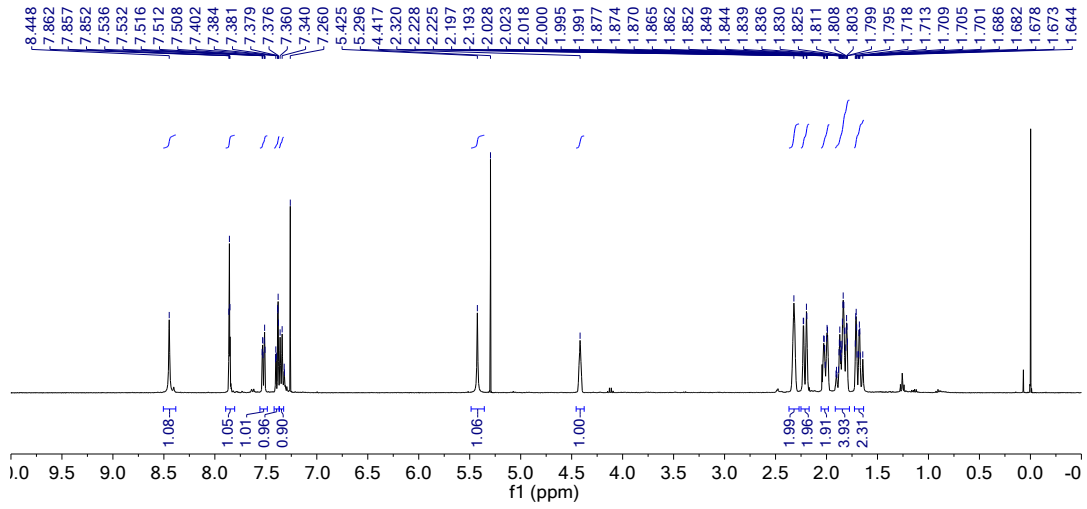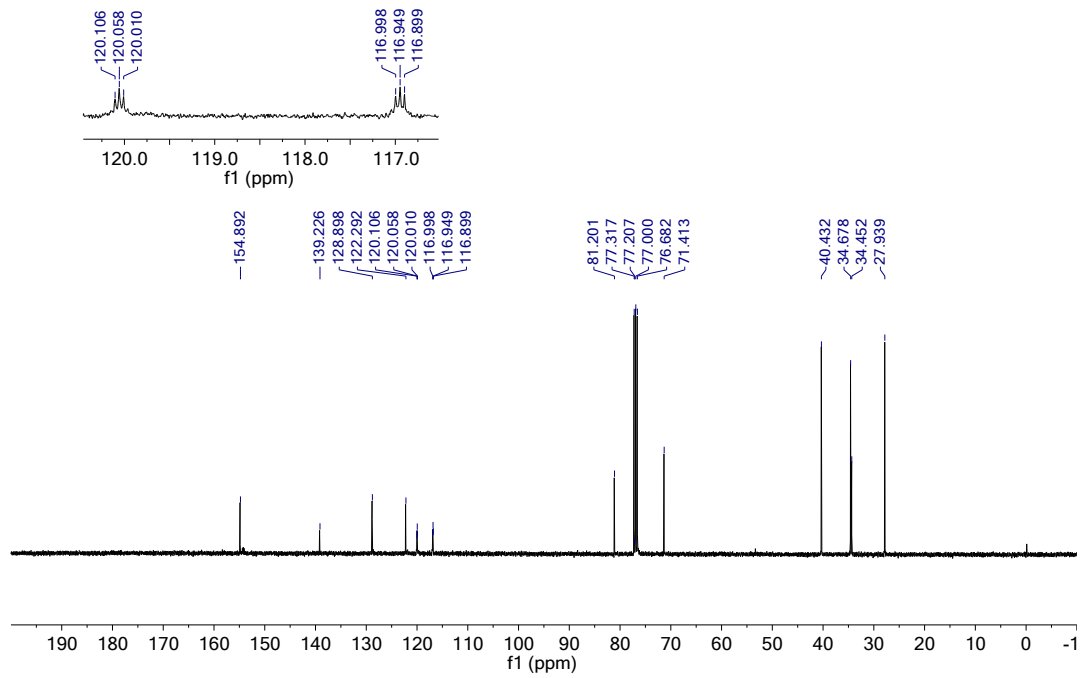

Blank test

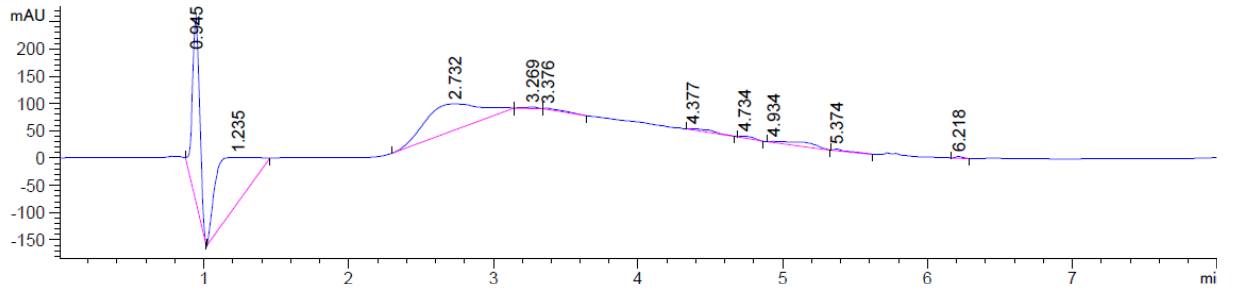

Compound 15

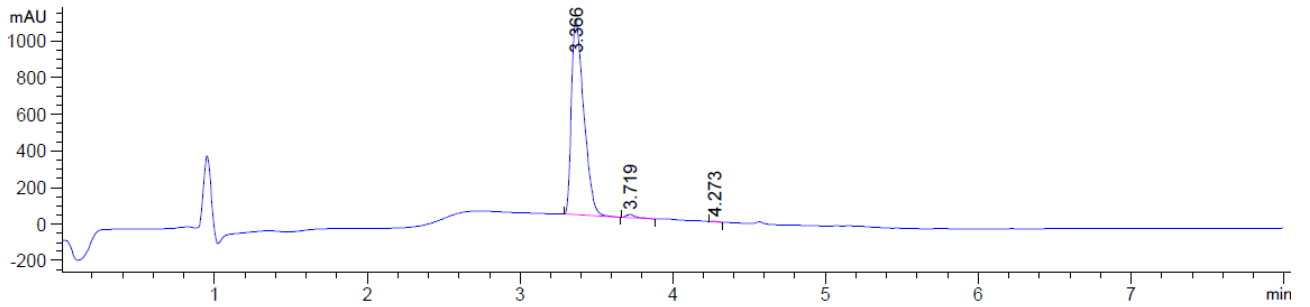

Signal 1: DAD1 A, Sig=210,4 Ref=360,100

| Peak # | RetTime [min] | Type | Width [min] | Area [mAU*s] | Height [mAU] | Area %  |
|--------|---------------|------|-------------|--------------|--------------|---------|
| 1      | 3.366         | BB   | 0.0829      | 5963.42188   | 1071.34827   | 98.6912 |
| 2      | 3.719         | BB   | 0.0618      | 71.82229     | 17.53464     | 1.1886  |
| 3      | 4.273         | BB   | 0.0426      | 7.26377      | 2.76769      | 0.1202  |

Totals : 6042.50793 1091.65060

Blank test

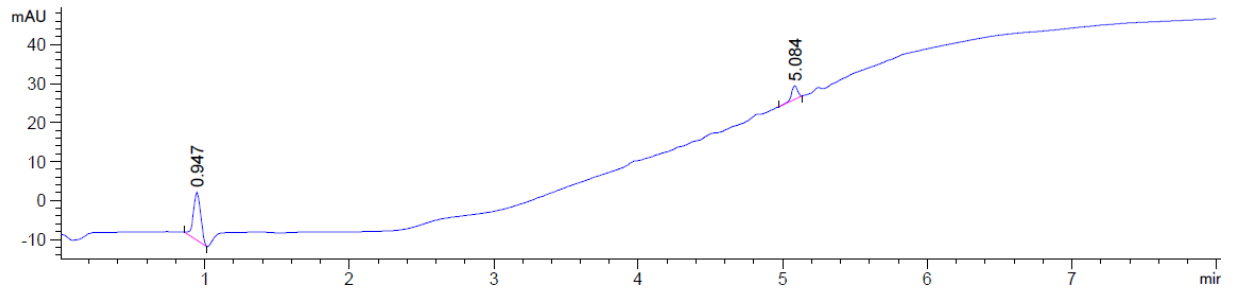

Compound 27

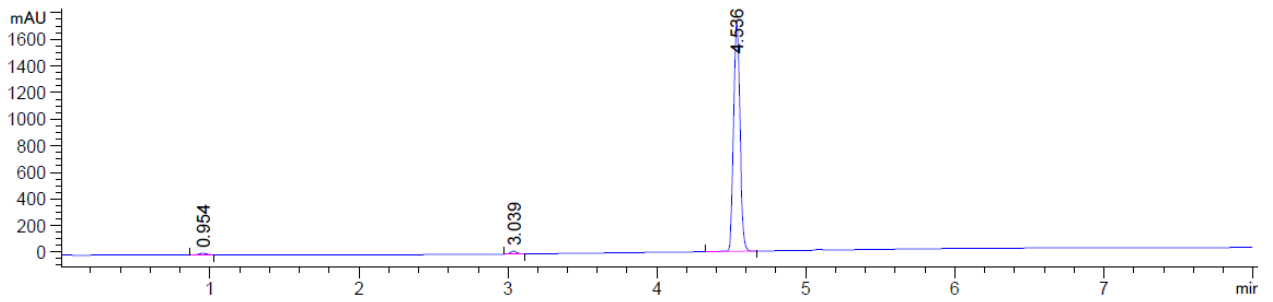

Signal 1: DAD1 A, Sig=245,4 Ref=360,100

| Peak # | RetTime [min] | Type | Width [min] | Area [mAU*s] | Height [mAU] | Area %  |
|--------|---------------|------|-------------|--------------|--------------|---------|
| 1      | 0.954         | BB   | 0.0605      | 44.98075     | 11.80430     | 0.8516  |
| 2      | 3.039         | BB   | 0.0472      | 61.01562     | 20.20074     | 1.1552  |
| 3      | 4.536         | BB   | 0.0487      | 5175.71143   | 1738.31812   | 97.9931 |

Totals : 5281.70779 1770.32316

### Blank test

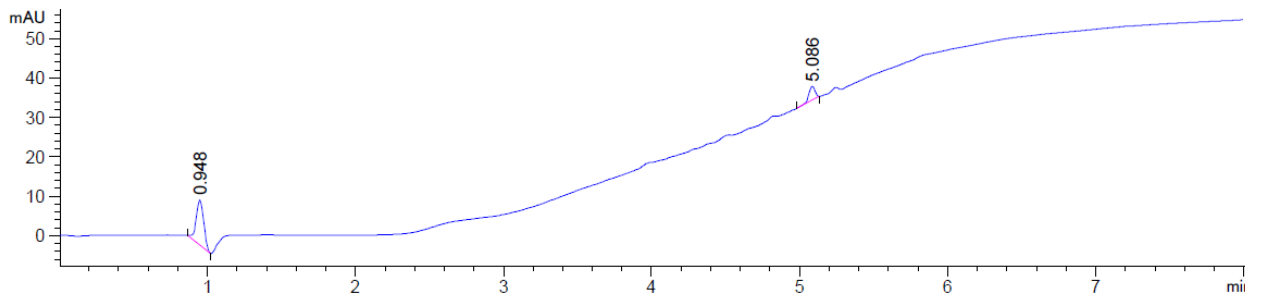

### Compound 29

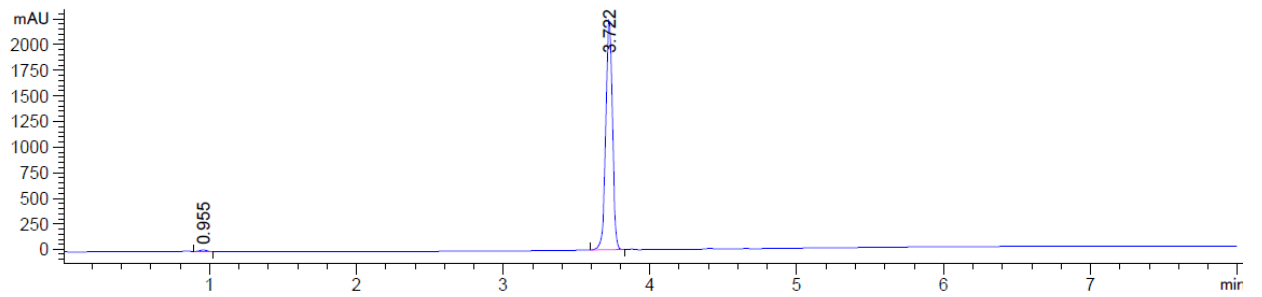

Signal 1: DAD1 A, Sig=245,4 Ref=360,100

| Peak # | RetTime [min] | Type | Width [min] | Area [mAU*s] | Height [mAU] | Area %  |
|--------|---------------|------|-------------|--------------|--------------|---------|
| 1      | 0.955         | BB   | 0.0576      | 54.87747     | 15.40726     | 0.7659  |
| 2      | 3.722         | BB   | 0.0488      | 7110.12598   | 2253.27002   | 99.2341 |

Totals : 7165.00344 2268.67728

Blank test

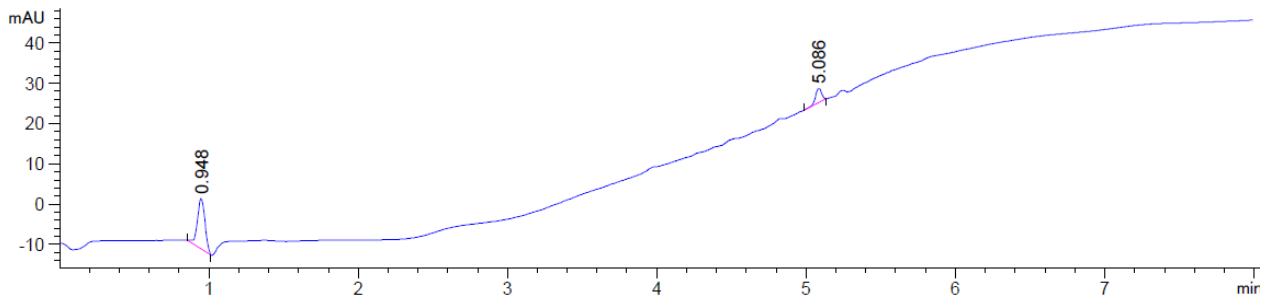

Compound 32

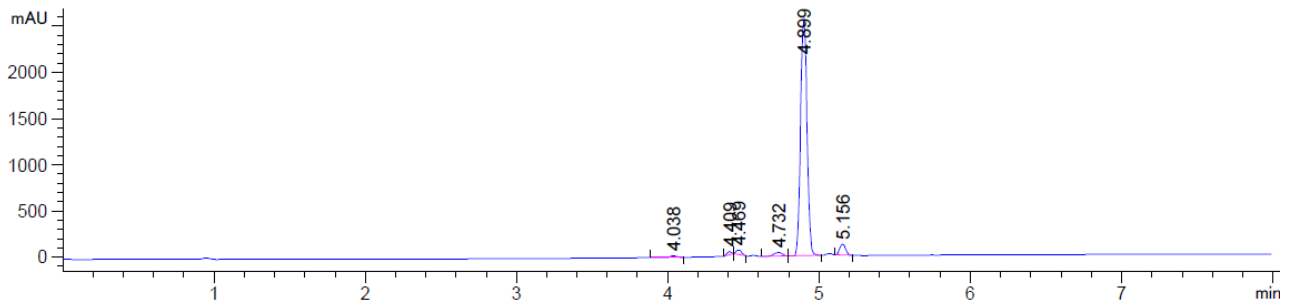

Signal 1: DAD1 A, Sig=245,4 Ref=360,100

| Peak # | RetTime [min] | Type | Width [min] | Area [mAU*s] | Height [mAU] | Area %  |
|--------|---------------|------|-------------|--------------|--------------|---------|
| 1      | 4.038         | BB   | 0.0495      | 54.91798     | 17.09327     | 0.6652  |
| 2      | 4.409         | BB   | 0.0349      | 67.59186     | 31.65423     | 0.8187  |
| 3      | 4.469         | BB   | 0.0404      | 115.69170    | 47.56844     | 1.4013  |
| 4      | 4.732         | BB   | 0.0697      | 158.29762    | 38.69275     | 1.9173  |
| 5      | 4.899         | BB   | 0.0465      | 7533.47803   | 2546.79443   | 91.2457 |
| 6      | 5.156         | BB   | 0.0443      | 326.27591    | 117.92603    | 3.9519  |

Totals : 8256.25310 2799.72915

| Compound | Molecular Formula                                           | Calculated |      |       | Found |      |       |
|----------|-------------------------------------------------------------|------------|------|-------|-------|------|-------|
|          |                                                             | C          | H    | N     | C     | H    | N     |
| 4        | $C_{16}H_{17}F_3N_2O_2 \cdot 0.5H_2O$                       | 57.31      | 5.41 | 8.35  | 57.46 | 5.70 | 8.22  |
| 7        | $C_{16}H_{17}F_3N_2O_2$                                     | 58.89      | 5.25 | 8.58  | 59.00 | 5.60 | 8.57  |
| 9        | $C_{18}H_{15}F_3N_2O_2$                                     | 62.07      | 4.34 | 8.04  | 62.04 | 4.43 | 7.98  |
| 12       | $C_{17}H_{27}N_3O_3 \cdot 0.25H_2O$                         | 62.65      | 8.50 | 12.89 | 62.64 | 8.61 | 12.74 |
| 14       | $C_{23}H_{30}N_2O_5 \cdot 0.1H_2O$                          | 66.36      | 7.31 | 6.73  | 66.13 | 7.32 | 6.64  |
| 17       | $C_{19}H_{27}ClN_6O_2 \cdot 0.7C_3H_6O$                     | 56.62      | 7.03 | 18.78 | 56.22 | 6.74 | 18.53 |
| 18       | $C_{20}H_{31}N_7O_2 \cdot 0.2C_5H_{12} \cdot 1.1C_3H_6O$    | 60.83      | 8.40 | 20.43 | 61.01 | 8.15 | 20.30 |
| 19       | $C_{21}H_{33}N_3O_4 \cdot 1H_2O$                            | 61.59      | 8.61 | 10.26 | 62.20 | 8.55 | 10.38 |
| 20       | $C_{21}H_{28}N_4O_3 \cdot 0.25C_6H_{14} \cdot 0.1 CH_2Cl_2$ | 65.49      | 7.71 | 13.52 | 65.42 | 7.61 | 13.54 |
| 21       | $C_{22}H_{28}FN_3O_3$                                       | 65.82      | 7.03 | 10.47 | 65.88 | 7.25 | 10.36 |
| 22       | $C_{18}H_{31}N_3O_4S \cdot 0.5H_2O$                         | 54.80      | 8.18 | 10.65 | 55.03 | 7.93 | 10.46 |
| 23       | $C_{19}H_{29}N_3O_3 \cdot 1H_2O$                            | 62.44      | 8.55 | 11.50 | 62.81 | 8.54 | 11.07 |
| 24       | $C_{18}H_{29}N_3O_3 \cdot 0.6C_4H_8O_2$                     | 63.10      | 8.77 | 10.82 | 62.94 | 8.96 | 10.97 |
| 25       | $C_{23}H_{31}N_3O_3 \cdot 0.25H_2O$                         | 68.72      | 7.90 | 10.45 | 68.96 | 7.78 | 10.21 |
| 26       | $C_{16}H_{27}N_3O_4S \cdot 0.2C_5H_{12} \cdot 0.15C_3H_6O$  | 55.07      | 8.02 | 11.04 | 55.48 | 7.57 | 10.60 |
| 28       | $C_{13}H_{17}N_3O_3$                                        | 59.30      | 6.51 | 15.96 | 59.46 | 6.70 | 14.31 |
| 30       | $C_{17}H_{18}ClF_3N_2O_3$                                   | 52.25      | 4.64 | 7.17  | 52.05 | 4.80 | 7.02  |
| 31       | $C_{17}H_{18}ClF_3N_2O_2$                                   | 54.48      | 4.84 | 7.47  | 54.57 | 4.84 | 7.64  |

**Table S1:** Elemental analysis data.

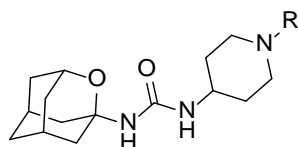

| Compound | R | Cytochrome inhibition <sup>[a]</sup> |         |          |         |                        |        | hERG inhibition <sup>[c]</sup> |
|----------|---|--------------------------------------|---------|----------|---------|------------------------|--------|--------------------------------|
|          |   | CYP 1A2                              | CYP 2C9 | CYP 2C19 | CYP 2D6 | CYP 3A4 <sup>[b]</sup> |        |                                |
|          |   |                                      |         |          |         | (BFC)                  | (DBF)  |                                |
| 12       |   | 6 ± 2                                | 2 ± 2   | 3 ± 3    | 3 ± 1   | 20 ± 4                 | 17 ± 1 | 2 ± 2                          |
| 22       |   | 1 ± 1                                | 1 ± 1   | 1 ± 1    | 1 ± 1   | 37 ± 3                 | 2 ± 2  | 2 ± 2                          |

**Table S2.** Inhibition (expressed as % of inhibition) of recombinant human cytochrome P450 enzymes and of hERG channel by selected inhibitors. <sup>a</sup>The cytochrome inhibition was tested at 10 μM for compound **12** and at 1 μM for compound **22**. <sup>b</sup>For the study of CYP3A4, two different substrates were used: benzyloxytrifluoromethylcoumarin (BFC) and dibenzylfluorescein (DBF). <sup>c</sup>The hERG inhibition was tested at 10 μM. All the values represent the mean ± SD of three measurements (n = 3).

| Compound  | IC <sub>50</sub> <i>h</i> LOX-5 | <i>h</i> COX-2 (10 μM) |
|-----------|---------------------------------|------------------------|
| <b>21</b> | > 100 μM                        | 11.4 %                 |
| <b>22</b> | > 100 μM                        | 3.8 %                  |
| <b>24</b> | > 100 μM                        | 13.6 %                 |

**Table S3:** IC<sub>50</sub> in human LOX-5 (*h*LOX-5) and inhibition (expressed as % of inhibition) of human COX-2 (*h*COX-2) at 10 μM for compounds **21**, **22** and **24**. Inhibition of *h*COX-2 was performed at Eurofins (catalogue reference 4186).



| Time   | ID      | Total Concentration (ng/mL) | Mean (ng/mL) | SD (ng/mL) |
|--------|---------|-----------------------------|--------------|------------|
| 0 h    | Mouse 1 | 0                           | 0            | 0          |
|        | Mouse 2 | 0                           |              |            |
|        | Mouse 3 | 0                           |              |            |
| 0.16 h | Mouse 1 | 140                         | 117.33       | 32.58      |
|        | Mouse 2 | 132                         |              |            |
|        | Mouse 3 | 80                          |              |            |
| 0.5 h  | Mouse 1 | 5.61                        | 5.85         | 0.22       |
|        | Mouse 2 | 6.05                        |              |            |
|        | Mouse 3 | 5.9                         |              |            |
| 1 h    | Mouse 1 | 1.41                        | 2.71         | 2.12       |
|        | Mouse 2 | 5.16                        |              |            |
|        | Mouse 3 | 1.56                        |              |            |
| 2 h    | Mouse 1 | 0.4                         | 0.30         | 0.09       |
|        | Mouse 2 | 0.23                        |              |            |
|        | Mouse 3 | 0.27                        |              |            |
| 4 h    | Mouse 1 | 0.13                        | 0.14         | 0.01       |
|        | Mouse 2 | 0.15                        |              |            |
|        | Mouse 3 | 0.14                        |              |            |
| 6 h    | Mouse 1 | 0.23                        | 0.12         | 0.12       |
|        | Mouse 2 | 0                           |              |            |
|        | Mouse 3 | 0.13                        |              |            |
| 24 h   | Mouse 1 | 0                           | 0.00         | 0.00       |
|        | Mouse 2 | 0                           |              |            |
|        | Mouse 3 | 0                           |              |            |

**Table S4:** Mean of concentrations of **22** in mouse plasma at different times after ip administration at 1 mg/kg.

| <b>Time</b> | <b>ID</b> | <b>Total<br/>Concentration<br/>(ng/mL)</b> | <b>Mean<br/>(ng/mL)</b> | <b>SD (ng/mL)</b> |
|-------------|-----------|--------------------------------------------|-------------------------|-------------------|
| 0 h         | Mouse 1   | 0                                          | 0                       | 0                 |
|             | Mouse 2   | 0                                          |                         |                   |
|             | Mouse 3   | 0                                          |                         |                   |
| 0.16 h      | Mouse 1   | 94.22                                      | 108.39                  | 12.43             |
|             | Mouse 2   | 113.52                                     |                         |                   |
|             | Mouse 3   | 117.44                                     |                         |                   |
| 0.5 h       | Mouse 1   | 37.55                                      | 20.75                   | 14.69             |
|             | Mouse 2   | 10.30                                      |                         |                   |
|             | Mouse 3   | 14.40                                      |                         |                   |
| 1 h         | Mouse 1   | 2.67                                       | 4.66                    | 3.30              |
|             | Mouse 2   | 8.47                                       |                         |                   |
|             | Mouse 3   | 2.83                                       |                         |                   |
| 2 h         | Mouse 1   | 0.18                                       | 0.35                    | 0.19              |
|             | Mouse 2   | 0.31                                       |                         |                   |
|             | Mouse 3   | 0.56                                       |                         |                   |
| 4 h         | Mouse 1   | 0.13                                       | 0.14                    | 0.02              |
|             | Mouse 2   | 0.14                                       |                         |                   |
|             | Mouse 3   | 0.16                                       |                         |                   |
| 6 h         | Mouse 1   | 0.13                                       | 0.13                    | 0.00              |
|             | Mouse 2   | 0.13                                       |                         |                   |
|             | Mouse 3   | 0.13                                       |                         |                   |
| 24 h        | Mouse 1   | 0.00                                       | 0.00                    | 0.00              |
|             | Mouse 2   | 0.00                                       |                         |                   |
|             | Mouse 3   | 0.00                                       |                         |                   |

**Table S5:** Mean of concentrations of **22** in mouse plasma at different times after iv administration at 1 mg/kg.

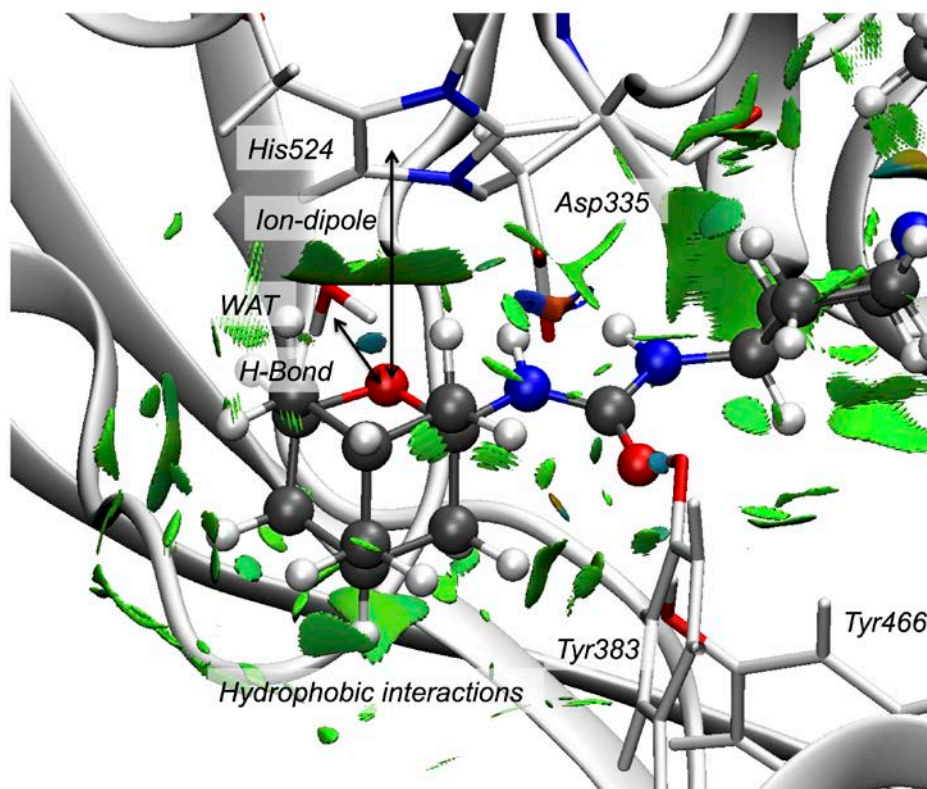

**Figure S1.** Representation of the noncovalent interactions (computed with NCIPLOT) at the active site of sEH in the presence of compound **22**. The weak interactions are shown as green surfaces, hydrogen-bonds are depicted in blue, and repulsive interactions in red. The interaction surfaces of the hydrogen-bond between the oxygen atom of compound **22** and the active site water molecule and the ion-dipole interaction between protonated His524 and the oxygen atom of compound **22** are highlighted. Additionally, several hydrophobic interactions between the adamantane group and residues Phe267, Tyr383, Leu408, Leu417, Met419, and Trp525 are observed.

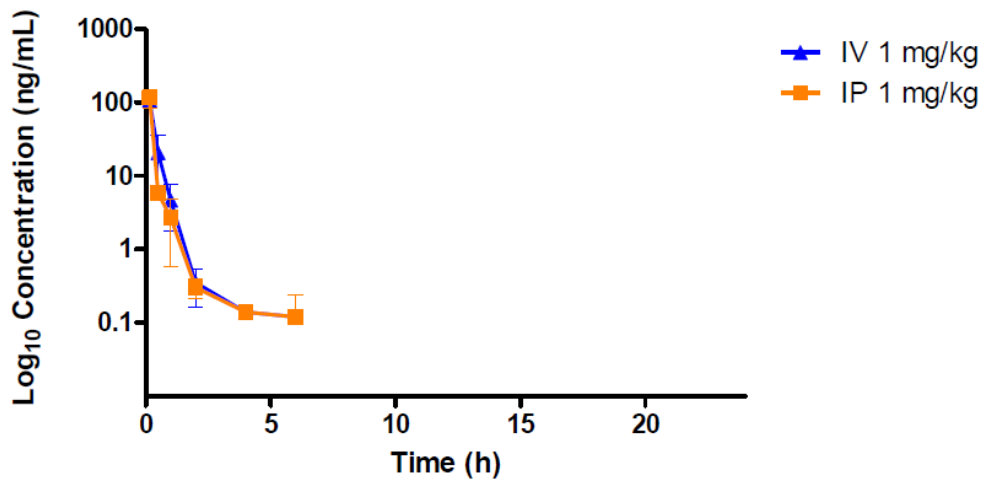

**Figure S2:** Concentration (scale log 10) vs time for ip and iv administration at 1 mg/kg of compound 22.

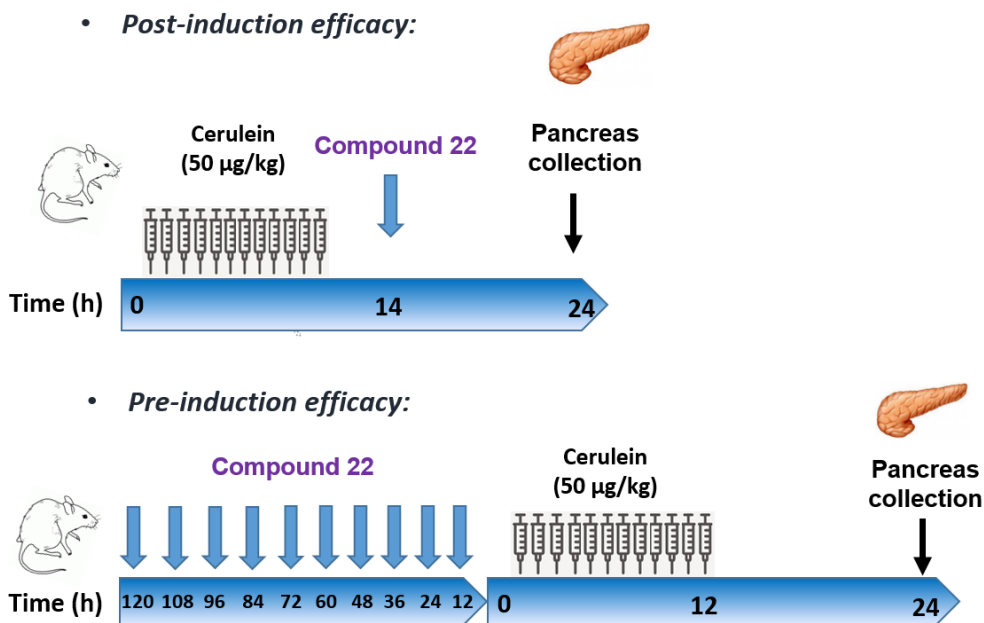

**Figure S3:** Experimental procedures of the two *in vivo* efficacy experiments of compound 22.
